# Supplementary material for: Epigenetic Features of Human Mesenchymal Stem Cells Determine Their Permissiveness for Induction of Relevant Transcriptional Changes by SYT-SSX1
Source: PLoS One. 2009 Nov 19;4(11):e7904. doi: 10.1371/journal.pone.0007904 (PMC2775947; doi:10.1371/journal.pone.0007904)
Supplement: Table S2 — List of probesets differentially expressed in human MSCs expressing SYT-SSX1 or an empty vector, 12 days after the infection and puromycin selection. A) Lists of the probesets that are differentially expressed with an FDR of 1% and a mean fold change >2. The four human MSCs batches were analyzed together with rank products (MSCs rankproduct). B) Lists of the probesets that are differentially expressed with a fold-change greater than 2 in each individual batch of human MSCs (MSCs b1–b4). (0.49 MB XLS) [file pone.0007904.s005.xls]

## Sheet: A
Table S2 A. Lists of the probesets that are differentially expressed In human MSCs infected with SYT-SSX1 or an empty vector, with FDR 1% and mean fold change > 2.The four human MSCs batches were analyzed together with rank products.
List of genes induced by SYT-SSX1 expression in human MSCs
probeset	entrez	gene_symbol	description	M	FDR
213479_at	4885	NPTX2	neuronal pentraxin II	4.1022	0
211597_s_at	84525	HOPX	HOP homeobox	4.0263	0
209570_s_at	27065	D4S234E	DNA segment on chromosome 4 (unique) 234 expressed sequence	3.1186	0
202409_at	3481	IGF2	insulin-like growth factor 2 (somatomedin A)	3.7592	0
204724_s_at	1299	COL9A3	collagen, type IX, alpha 3	2.5028	0
209047_at	358	AQP1	aquaporin 1 (Colton blood group)	2.6018	0
227297_at	3680	ITGA9	integrin, alpha 9	2.3521	0
230104_s_at	11076	TPPP	tubulin polymerization promoting protein	2.281	0
204379_s_at	2261	FGFR3	fibroblast growth factor receptor 3	2.42	0
204584_at	3897	L1CAM	L1 cell adhesion molecule	2.6187	0
209569_x_at	27065	D4S234E	DNA segment on chromosome 4 (unique) 234 expressed sequence	2.6427	0
223869_at	50964	SOST	sclerosteosis	2.7399	0
242931_at	79836	LONRF3	LON peptidase N-terminal domain and ring finger 3	1.9306	0
226913_s_at	30812	SOX8	SRY (sex determining region Y)-box 8	1.7395	0
229580_at	-	-	-	1.6584	0
235456_at	-	-	-	1.5251	0
203395_s_at	3280	HES1	hairy and enhancer of split 1, (Drosophila)	1.5083	0
228885_at	256691	MAMDC2	MAM domain containing 2	1.8142	0
202575_at	1382	CRABP2	cellular retinoic acid binding protein 2	1.7263	0
225056_at	57568	SIPA1L2	signal-induced proliferation-associated 1 like 2	1.5964	0
232035_at	8294	HIST1H4I	histone cluster 1, H4i	1.4364	0
213418_at	3310	HSPA6	heat shock 70kDa protein 6 (HSP70B')	2.0417	0.0005
230493_at	387914	SHISA2	shisa homolog 2 (Xenopus laevis)	1.4508	0.0004
227641_at	146330	FBXL16	F-box and leucine-rich repeat protein 16	1.4299	0.0004
39248_at	360	AQP3	aquaporin 3 (Gill blood group)	1.5654	0.0004
217388_s_at	8942	KYNU	kynureninase (L-kynurenine hydrolase)	1.4972	0.0004
203394_s_at	3280	HES1	hairy and enhancer of split 1, (Drosophila)	1.2675	0.0004
224724_at	55959	SULF2	sulfatase 2	1.9011	0.0004
217028_at	7852	CXCR4	chemokine (C-X-C motif) receptor 4	1.5279	0.0003
221019_s_at	81035	COLEC12	collectin sub-family member 12	1.8363	0.0003
209170_s_at	2824	GPM6B	glycoprotein M6B	1.5458	0.0003
218678_at	10763	NES	nestin	1.2634	0.0003
207542_s_at	358	AQP1	aquaporin 1 (Colton blood group)	1.3958	0.0003
214414_x_at	3039	HBA1	hemoglobin, alpha 1	1.4834	0.0003
200953_s_at	894	CCND2	cyclin D2	1.2466	0.0003
225016_at	147495	APCDD1	adenomatosis polyposis coli down-regulated 1	1.5815	0.0003
209560_s_at	8788	DLK1	delta-like 1 homolog (Drosophila)	1.8719	0.0003
233555_s_at	55959	SULF2	sulfatase 2	1.7937	0.0003
204465_s_at	9118	INA	internexin neuronal intermediate filament protein, alpha	1.3748	0.0005
232397_at	-	-	-	1.2234	0.0005
206924_at	3589	IL11	interleukin 11	1.389	0.0005
205081_at	1396	CRIP1	cysteine-rich protein 1 (intestinal)	1.4234	0.0005
223500_at	10815	CPLX1	complexin 1	1.2872	0.0007
223168_at	58480	RHOU	ras homolog gene family, member U	1.4769	0.0007
213201_s_at	7138	TNNT1	troponin T type 1 (skeletal, slow)	1.2682	0.0007
205290_s_at	650	BMP2	bone morphogenetic protein 2	1.1528	0.0009
201721_s_at	7805	LAPTM5	lysosomal multispanning membrane protein 5	1.474	0.0009
242005_at	-	-	-	1.4568	0.0008
215506_s_at	9077	DIRAS3	DIRAS family, GTP-binding RAS-like 3	1.1206	0.0008
228176_at	1903	S1PR3	sphingosine-1-phosphate receptor 3	1.2913	0.0012
213506_at	2150	F2RL1	coagulation factor II (thrombin) receptor-like 1	1.1709	0.0014
227480_at	56241	SUSD2	sushi domain containing 2	1.7418	0.0015
219093_at	55022	PID1	phosphotyrosine interaction domain containing 1	1.0697	0.0015
224646_x_at	283120	H19	H19, imprinted maternally expressed transcript (non-protein coding)	1.9098	0.0017
241418_at	344887	LOC344887	similar to hCG2041270	1.332	0.0016
206140_at	9355	LHX2	LIM homeobox 2	1.7208	0.0016
221204_s_at	55118	CRTAC1	cartilage acidic protein 1	1.3564	0.0016
229242_at	-	-	-	1.3076	0.0017
203698_s_at	2487	FRZB	frizzled-related protein	1.2456	0.0017
206561_s_at	57016	AKR1B10	aldo-keto reductase family 1, member B10 (aldose reductase)	1.0706	0.0017
203697_at	2487	FRZB	frizzled-related protein	1.2574	0.0016
233587_s_at	57568	SIPA1L2	signal-induced proliferation-associated 1 like 2	1.1868	0.0016
228988_at	7552	ZNF711	zinc finger protein 711	1.0903	0.0016
205289_at	650	BMP2	bone morphogenetic protein 2	1.1331	0.0017
223467_at	51655	RASD1	RAS, dexamethasone-induced 1	1.0951	0.0017
230660_at	56256	SERTAD4	SERTA domain containing 4	1.3048	0.0017
210654_at	8793	TNFRSF10D	tumor necrosis factor receptor superfamily, member 10d, decoy with truncated death domain	1.0547	0.0016
226828_s_at	26508	HEYL	hairy/enhancer-of-split related with YRPW motif-like	1.3469	0.0024
203680_at	5577	PRKAR2B	protein kinase, cAMP-dependent, regulatory, type II, beta	1.1345	0.0023
231259_s_at	-	-	-	1.1109	0.0023
242775_at	-	-	-	1.0399	0.0023
205691_at	9143	SYNGR3	synaptogyrin 3	1.0074	0.0028
208180_s_at	8294	HIST1H4I	histone cluster 1, H4i	1.1396	0.0027
210387_at	8339	HIST1H2BG	histone cluster 1, H2bg	1.1728	0.0027
226811_at	54855	FAM46C	family with sequence similarity 46, member C	1.1474	0.0028
221558_s_at	51176	LEF1	lymphoid enhancer-binding factor 1	1.1435	0.0029
223278_at	2706	GJB2	gap junction protein, beta 2, 26kDa	1.0895	0.0029
206315_at	9244	CRLF1	cytokine receptor-like factor 1	1.5207	0.003
226415_at	57687	VAT1L	vesicle amine transport protein 1 homolog-like (T. californica)	1.1103	0.0034
219181_at	9388	LIPG	lipase, endothelial	1.2567	0.0038
232165_at	83481	EPPK1	epiplakin 1	1.1093	0.0039
205975_s_at	3231	HOXD1	homeobox D1	1.4189	0.0038
218638_s_at	10417	SPON2	spondin 2, extracellular matrix protein	1.5058	0.0039
215008_at	7093	TLL2	tolloid-like 2	1.0912	0.0041
205876_at	3977	LIFR	leukemia inhibitory factor receptor alpha	1.0081	0.0042
224215_s_at	28514	DLL1	delta-like 1 (Drosophila)	1.0699	0.0048
235210_s_at	157869	RPESP	RPE-spondin	1.0709	0.0049
243173_at	164633	CABP7	calcium binding protein 7	1.2647	0.0049
239587_at	-	-	-	1.0037	0.0048
219895_at	55026	FAM70A	family with sequence similarity 70, member A	1.5614	0.005
231513_at	-	-	-	1.2204	0.0052
225207_at	5166	PDK4	pyruvate dehydrogenase kinase, isozyme 4	1.4534	0.0053
229057_at	6326	SCN2A	sodium channel, voltage-gated, type II, alpha subunit	1.0012	0.0054
202638_s_at	3383	ICAM1	intercellular adhesion molecule 1	1.1097	0.0054
207426_s_at	7292	TNFSF4	tumor necrosis factor (ligand) superfamily, member 4	1.0311	0.0057
202581_at	3303	HSPA1A	heat shock 70kDa protein 1A	1.2222	0.0057
212070_at	9289	GPR56	G protein-coupled receptor 56	1.1622	0.0062
209459_s_at	18	ABAT	4-aminobutyrate aminotransferase	1.1402	0.0061
1558404_at	644242	LOC644242	hypothetical protein LOC644242	1.002	0.0065
210508_s_at	3785	KCNQ2	potassium voltage-gated channel, KQT-like subfamily, member 2	1.003	0.0067
1562102_at	1645	AKR1C1	aldo-keto reductase family 1, member C1 (dihydrodiol dehydrogenase 1; 20-alpha (3-alpha)-hydroxysteroid dehydrogenase)	1.0838	0.0075
209652_s_at	5228	PGF	placental growth factor	1.001	0.008
206569_at	11009	IL24	interleukin 24	1.0615	0.008
213348_at	1028	CDKN1C	cyclin-dependent kinase inhibitor 1C (p57, Kip2)	1.0232	0.009
222043_at	1191	CLU	clusterin	1.0362	0.0089
206765_at	3759	KCNJ2	potassium inwardly-rectifying channel, subfamily J, member 2	1.1553	0.0093
226498_at	-	-	-	1.2755	0.0092
200800_s_at	3303	HSPA1A	heat shock 70kDa protein 1A	1.1835	0.0094
235337_at	-	-	-	1.0381	0.0093
207038_at	9120	SLC16A6	solute carrier family 16, member 6 (monocarboxylic acid transporter 7)	1.2463	0.0094
209990_s_at	9568	GABBR2	gamma-aminobutyric acid (GABA) B receptor, 2	1.0944	0.0097
List of genes repressed by SYT-SSX1 expression in human MSCs
probeset	entrez	gene_symbol	description	M	FDR
206825_at	5021	OXTR	oxytocin receptor	-1.7118	0
225895_at	171024	SYNPO2	synaptopodin 2	-1.8161	0
225720_at	171024	SYNPO2	synaptopodin 2	-1.7097	0
213802_at	-	-	-	-1.546	0
204052_s_at	6424	SFRP4	secreted frizzled-related protein 4	-1.6832	0
205159_at	1439	CSF2RB	colony stimulating factor 2 receptor, beta, low-affinity (granulocyte-macrophage)	-1.5096	0
225721_at	171024	SYNPO2	synaptopodin 2	-1.6134	0
204320_at	1301	COL11A1	collagen, type XI, alpha 1	-1.3691	0
231879_at	1303	COL12A1	collagen, type XII, alpha 1	-1.4137	0
204933_s_at	4982	TNFRSF11B	tumor necrosis factor receptor superfamily, member 11b	-1.2861	0
218934_s_at	27129	HSPB7	heat shock 27kDa protein family, member 7 (cardiovascular)	-1.1811	0
207148_x_at	51778	MYOZ2	myozenin 2	-1.1707	0
215704_at	2312	FLG	filaggrin	-1.5358	0.0008
229759_s_at	79674	VEPH1	ventricular zone expressed PH domain homolog 1 (zebrafish)	-1.3092	0.0007
37892_at	1301	COL11A1	collagen, type XI, alpha 1	-1.2725	0.0007
203766_s_at	25802	LMOD1	leiomodin 1 (smooth muscle)	-1.2646	0.0006
227145_at	84171	LOXL4	lysyl oxidase-like 4	-1.1023	0.0006
244280_at	-	-	-	-1.2931	0.0006
223734_at	84709	OSAP	ovary-specific acidic protein	-1.1952	0.0005
202338_at	7083	TK1	thymidine kinase 1, soluble	-1.1898	0.0005
218149_s_at	55893	ZNF395	zinc finger protein 395	-1.1069	0.001
232693_s_at	55893	ZNF395	zinc finger protein 395	-1.1112	0.0009
225373_at	64115	C10orf54	chromosome 10 open reading frame 54	-1.2092	0.0009
204430_s_at	6518	SLC2A5	solute carrier family 2 (facilitated glucose/fructose transporter), member 5	-1.2035	0.0008
220327_at	389136	VGLL3	vestigial like 3 (Drosophila)	-1.2039	0.0012
202580_x_at	2305	FOXM1	forkhead box M1	-1.2342	0.0015
209708_at	26002	MOXD1	monooxygenase, DBH-like 1	-1.0842	0.0015
1555758_a_at	1033	CDKN3	cyclin-dependent kinase inhibitor 3	-1.2115	0.0014
219213_at	58494	JAM2	junctional adhesion molecule 2	-1.0179	0.0021
219918_s_at	259266	ASPM	asp (abnormal spindle) homolog, microcephaly associated (Drosophila)	-1.1637	0.002
223216_x_at	55893	ZNF395	zinc finger protein 395	-1.0656	0.0019
229641_at	-	-	-	-1.0327	0.0021
218009_s_at	9055	PRC1	protein regulator of cytokinesis 1	-1.0623	0.0025
1557286_at	-	-	-	-1.1984	0.0027
213782_s_at	51778	MYOZ2	myozenin 2	-1.0123	0.0031
205518_s_at	8418	CMAH	cytidine monophosphate-N-acetylneuraminic acid hydroxylase (CMP-N-acetylneuraminate monooxygenase) pseudogene	-1.0177	0.0035
202870_s_at	991	CDC20	cell division cycle 20 homolog (S. cerevisiae)	-1.2416	0.0036
230083_at	54532	USP53	ubiquitin specific peptidase 53	-1.0341	0.0035
1569263_at	-	-	-	-1.0845	0.0047
204932_at	4982	TNFRSF11B	tumor necrosis factor receptor superfamily, member 11b	-1.0319	0.0046
230710_at	-	-	-	-1.235	0.0045
213764_s_at	8076	MFAP5	microfibrillar associated protein 5	-1.0975	0.0056
206101_at	1842	ECM2	extracellular matrix protein 2, female organ and adipocyte specific	-1.1154	0.0061
236028_at	3381	IBSP	integrin-binding sialoprotein	-1.0868	0.0061
231766_s_at	1303	COL12A1	collagen, type XII, alpha 1	-1.013	0.006
209714_s_at	1033	CDKN3	cyclin-dependent kinase inhibitor 3	-1.0206	0.0088
220639_at	79853	TM4SF20	transmembrane 4 L six family member 20	-1.2224	0.0099

## Sheet: B
Table S2 B. Lists of the probesets that are differentially expressed with fold-change greater than 2 in each individual batch of human MSCs.
List of genes induced by SYT-SSX1 expression in human MSCs batch 1
probeset	entrez	gene_symbol	description	M
211597_s_at	84525	HOPX	HOP homeobox	5.4984
202409_at	3481	IGF2	insulin-like growth factor 2 (somatomedin A)	4.28248
223869_at	50964	SOST	sclerosteosis	3.92928
225207_at	5166	PDK4	pyruvate dehydrogenase kinase, isozyme 4	3.65735
213479_at	4885	NPTX2	neuronal pentraxin II	3.56609
202859_x_at	3576	IL8	interleukin 8	2.66143
206336_at	6372	CXCL6	chemokine (C-X-C motif) ligand 6 (granulocyte chemotactic protein 2)	2.61299
205290_s_at	650	BMP2	bone morphogenetic protein 2	2.59827
1562102_at	1645	AKR1C1	aldo-keto reductase family 1, member C1 (dihydrodiol dehydrogenase 1; 20-alpha (3-alpha)-hydroxysteroid dehydrogenase)	2.56025
213418_at	3310	HSPA6	heat shock 70kDa protein 6 (HSP70B')	2.54251
226913_s_at	30812	SOX8	SRY (sex determining region Y)-box 8	2.52435
1564807_at	-	-	-	2.47055
216248_s_at	4929	NR4A2	nuclear receptor subfamily 4, group A, member 2	2.46617
202581_at	3303	HSPA1A	heat shock 70kDa protein 1A	2.42878
241418_at	344887	LOC344887	similar to hCG2041270	2.42536
235456_at	-	-	-	2.40086
1569403_at	-	-	-	2.39902
221558_s_at	51176	LEF1	lymphoid enhancer-binding factor 1	2.39248
209570_s_at	27065	D4S234E	DNA segment on chromosome 4 (unique) 234 expressed sequence	2.39214
205289_at	650	BMP2	bone morphogenetic protein 2	2.34661
242931_at	79836	LONRF3	LON peptidase N-terminal domain and ring finger 3	2.34191
215506_s_at	9077	DIRAS3	DIRAS family, GTP-binding RAS-like 3	2.28419
235259_at	133015	PACRGL	PARK2 co-regulated-like	2.27073
230585_at	-	-	-	2.26159
217388_s_at	8942	KYNU	kynureninase (L-kynurenine hydrolase)	2.23912
239010_at	642477	FLJ39632	hypothetical LOC642477	2.22115
228885_at	256691	MAMDC2	MAM domain containing 2	2.21939
204470_at	2919	CXCL1	chemokine (C-X-C motif) ligand 1 (melanoma growth stimulating activity, alpha)	2.20299
209732_at	9976	CLEC2B	C-type lectin domain family 2, member B	2.20149
227297_at	3680	ITGA9	integrin, alpha 9	2.18969
204379_s_at	2261	FGFR3	fibroblast growth factor receptor 3	2.1534
231513_at	-	-	-	2.13716
200800_s_at	3303	HSPA1A	heat shock 70kDa protein 1A	2.12212
202843_at	4189	DNAJB9	DnaJ (Hsp40) homolog, subfamily B, member 9	2.10372
204774_at	2123	EVI2A	ecotropic viral integration site 2A	2.0898
205825_at	5122	PCSK1	proprotein convertase subtilisin/kexin type 1	2.08575
204724_s_at	1299	COL9A3	collagen, type IX, alpha 3	2.06149
205445_at	5617	PRL	prolactin	2.04341
204622_x_at	4929	NR4A2	nuclear receptor subfamily 4, group A, member 2	2.00986
228186_s_at	84870	RSPO3	R-spondin 3 homolog (Xenopus laevis)	1.98984
237301_at	-	-	-	1.98833
226003_at	55605	KIF21A	kinesin family member 21A	1.9876
220729_at	-	-	-	1.9632
200953_s_at	894	CCND2	cyclin D2	1.95363
219572_at	93664	CADPS2	Ca++-dependent secretion activator 2	1.92625
229963_at	340542	BEX5	BEX family member 5	1.91996
1556678_a_at	-	-	-	1.9065
219023_at	55435	C4orf16	chromosome 4 open reading frame 16	1.89288
206765_at	3759	KCNJ2	potassium inwardly-rectifying channel, subfamily J, member 2	1.88495
230766_at	-	-	-	1.88367
207038_at	9120	SLC16A6	solute carrier family 16, member 6 (monocarboxylic acid transporter 7)	1.87701
228176_at	1903	S1PR3	sphingosine-1-phosphate receptor 3	1.87103
219209_at	64135	IFIH1	interferon induced with helicase C domain 1	1.86797
229715_at	-	-	-	1.85002
205543_at	22824	HSPA4L	heat shock 70kDa protein 4-like	1.84771
221523_s_at	58528	RRAGD	Ras-related GTP binding D	1.84289
238568_s_at	-	-	-	1.84142
206914_at	56253	CRTAM	cytotoxic and regulatory T cell molecule	1.82641
230748_at	9120	SLC16A6	solute carrier family 16, member 6 (monocarboxylic acid transporter 7)	1.82481
214974_x_at	6374	CXCL5	chemokine (C-X-C motif) ligand 5	1.81435
221648_s_at	-	-	-	1.8037
230493_at	387914	SHISA2	shisa homolog 2 (Xenopus laevis)	1.80011
214016_s_at	6421	SFPQ	splicing factor proline/glutamine-rich (polypyrimidine tract binding protein associated)	1.79668
1558740_s_at	-	-	-	1.78045
243704_at	-	-	-	1.76577
200799_at	3303	HSPA1A	heat shock 70kDa protein 1A	1.76369
226800_at	84455	EFCAB7	EF-hand calcium binding domain 7	1.76326
208499_s_at	5611	DNAJC3	DnaJ (Hsp40) homolog, subfamily C, member 3	1.75426
236106_at	-	-	-	1.74964
219132_at	57161	PELI2	pellino homolog 2 (Drosophila)	1.74791
238681_at	284161	GDPD1	glycerophosphodiester phosphodiesterase domain containing 1	1.73804
203680_at	5577	PRKAR2B	protein kinase, cAMP-dependent, regulatory, type II, beta	1.72798
220346_at	441024	MTHFD2L	methylenetetrahydrofolate dehydrogenase (NADP+ dependent) 2-like	1.7138
238831_at	55161	TMEM33	transmembrane protein 33	1.71046
232397_at	-	-	-	1.70114
234192_s_at	80318	GKAP1	G kinase anchoring protein 1	1.69192
210387_at	8339	HIST1H2BG	histone cluster 1, H2bg	1.69005
242881_x_at	-	-	-	1.68739
241680_at	-	-	-	1.66542
226811_at	54855	FAM46C	family with sequence similarity 46, member C	1.66521
222735_at	55151	TMEM38B	transmembrane protein 38B	1.66131
209774_x_at	2920	CXCL2	chemokine (C-X-C motif) ligand 2	1.66078
205876_at	3977	LIFR	leukemia inhibitory factor receptor alpha	1.65444
218772_x_at	55151	TMEM38B	transmembrane protein 38B	1.65356
213409_s_at	6009	RHEB	Ras homolog enriched in brain	1.6462
214751_at	90333	ZNF468	zinc finger protein 468	1.64036
209047_at	358	AQP1	aquaporin 1 (Colton blood group)	1.63105
226158_at	54800	KLHL24	kelch-like 24 (Drosophila)	1.62676
211368_s_at	834	CASP1	caspase 1, apoptosis-related cysteine peptidase (interleukin 1, beta, convertase)	1.62662
203697_at	2487	FRZB	frizzled-related protein	1.62416
236539_at	26191	PTPN22	protein tyrosine phosphatase, non-receptor type 22 (lymphoid)	1.61679
230104_s_at	11076	TPPP	tubulin polymerization promoting protein	1.61523
235759_at	-	-	-	1.61255
224724_at	55959	SULF2	sulfatase 2	1.61128
231259_s_at	-	-	-	1.61034
216450_x_at	7184	HSP90B1	heat shock protein 90kDa beta (Grp94), member 1	1.60867
235274_at	-	-	-	1.6016
230760_at	7544	ZFY	zinc finger protein, Y-linked	1.59561
202146_at	3475	IFRD1	interferon-related developmental regulator 1	1.59372
209681_at	10560	SLC19A2	solute carrier family 19 (thiamine transporter), member 2	1.59308
242775_at	-	-	-	1.5906
223168_at	58480	RHOU	ras homolog gene family, member U	1.58513
213637_at	-	-	-	1.58314
236193_at	8339	HIST1H2BG	histone cluster 1, H2bg	1.58193
1555968_a_at	-	-	-	1.58071
209170_s_at	2824	GPM6B	glycoprotein M6B	1.57991
1553142_at	144811	C13orf31	chromosome 13 open reading frame 31	1.57701
236330_at	-	-	-	1.56772
205226_at	5157	PDGFRL	platelet-derived growth factor receptor-like	1.56768
202286_s_at	4070	TACSTD2	tumor-associated calcium signal transducer 2	1.56063
1557169_x_at	493812	HCG11	HLA complex group 11	1.5557
209921_at	23657	SLC7A11	solute carrier family 7, (cationic amino acid transporter, y+ system) member 11	1.54718
243515_at	-	-	-	1.54511
225421_at	135293	PM20D2	peptidase M20 domain containing 2	1.54358
1569183_a_at	1121	CHM	choroideremia (Rab escort protein 1)	1.53925
226907_at	81706	PPP1R14C	protein phosphatase 1, regulatory (inhibitor) subunit 14C	1.53881
235681_at	-	-	-	1.5363
242273_at	-	-	-	1.53599
225290_at	55500	ETNK1	ethanolamine kinase 1	1.52887
211756_at	5744	PTHLH	parathyroid hormone-like hormone	1.52429
211742_s_at	2124	EVI2B	ecotropic viral integration site 2B	1.52334
219863_at	51191	HERC5	hect domain and RLD 5	1.5192
1556194_a_at	-	-	-	1.51861
1554007_at	-	-	-	1.51657
228600_x_at	340277	C7orf46	chromosome 7 open reading frame 46	1.5148
228050_at	84135	UTP15	UTP15, U3 small nucleolar ribonucleoprotein, homolog (S. cerevisiae)	1.50307
218972_at	55761	TTC17	tetratricopeptide repeat domain 17	1.49984
219284_at	79663	HSPBAP1	HSPB (heat shock 27kDa) associated protein 1	1.49926
1554462_a_at	4189	DNAJB9	DnaJ (Hsp40) homolog, subfamily B, member 9	1.48338
229057_at	6326	SCN2A	sodium channel, voltage-gated, type II, alpha subunit	1.48006
230815_at	389765	LOC389765	similar to KIF27C	1.47776
1558404_at	644242	LOC644242	hypothetical protein LOC644242	1.4756
233952_s_at	49854	ZNF295	zinc finger protein 295	1.47228
205074_at	6584	SLC22A5	solute carrier family 22 (organic cation/carnitine transporter), member 5	1.47143
235434_at	-	-	-	1.46967
229975_at	658	BMPR1B	bone morphogenetic protein receptor, type IB	1.46893
225123_at	-	-	-	1.46319
221563_at	11221	DUSP10	dual specificity phosphatase 10	1.46175
203633_at	1374	CPT1A	carnitine palmitoyltransferase 1A (liver)	1.45756
1559072_a_at	114794	ELFN2	extracellular leucine-rich repeat and fibronectin type III domain containing 2	1.4533
209267_s_at	64116	SLC39A8	solute carrier family 39 (zinc transporter), member 8	1.45233
203395_s_at	3280	HES1	hairy and enhancer of split 1, (Drosophila)	1.45063
218371_s_at	55269	PSPC1	paraspeckle component 1	1.44742
214155_s_at	113251	LARP4	La ribonucleoprotein domain family, member 4	1.44602
218566_s_at	26973	CHORDC1	cysteine and histidine-rich domain (CHORD)-containing 1	1.44097
202708_s_at	8349	HIST2H2BE	histone cluster 2, H2be	1.43916
210663_s_at	8942	KYNU	kynureninase (L-kynurenine hydrolase)	1.43243
228087_at	90693	CCDC126	coiled-coil domain containing 126	1.43009
229123_at	-	-	-	1.42953
225056_at	57568	SIPA1L2	signal-induced proliferation-associated 1 like 2	1.42812
214099_s_at	9659	PDE4DIP	phosphodiesterase 4D interacting protein	1.42629
39248_at	360	AQP3	aquaporin 3 (Gill blood group)	1.42201
242928_at	-	-	-	1.41669
232729_at	-	-	-	1.41554
206247_at	3106	HLA-B	major histocompatibility complex, class I, B	1.41394
207147_at	1746	DLX2	distal-less homeobox 2	1.412
232035_at	8294	HIST1H4I	histone cluster 1, H4i	1.41194
239863_at	-	-	-	1.41101
222736_s_at	55151	TMEM38B	transmembrane protein 38B	1.4089
244502_at	-	-	-	1.40874
235155_at	56898	BDH2	3-hydroxybutyrate dehydrogenase, type 2	1.40673
229075_at	166378	SPATA5	spermatogenesis associated 5	1.40618
238476_at	153222	C5orf41	chromosome 5 open reading frame 41	1.40592
229699_at	100129550	LOC100129550	hypothetical protein LOC100129550	1.40438
1553133_at	203228	C9orf72	chromosome 9 open reading frame 72	1.40295
227309_at	55432	YOD1	YOD1 OTU deubiquinating enzyme 1 homolog (S. cerevisiae)	1.39855
218093_s_at	55608	ANKRD10	ankyrin repeat domain 10	1.39752
231382_at	8817	FGF18	fibroblast growth factor 18	1.39557
217630_at	90806	ANGEL2	angel homolog 2 (Drosophila)	1.39536
232429_at	-	-	-	1.39359
211379_x_at	8706	B3GALNT1	beta-1,3-N-acetylgalactosaminyltransferase 1 (globoside blood group)	1.39356
230660_at	56256	SERTAD4	SERTA domain containing 4	1.39154
227997_at	54756	IL17RD	interleukin 17 receptor D	1.38443
212834_at	11056	DDX52	DEAD (Asp-Glu-Ala-Asp) box polypeptide 52	1.37638
236380_at	-	-	-	1.37316
232345_at	29919	C18orf8	chromosome 18 open reading frame 8	1.37261
1569191_at	664701	ZNF826	zinc finger protein 826	1.3706
202672_s_at	467	ATF3	activating transcription factor 3	1.36942
204224_s_at	2643	GCH1	GTP cyclohydrolase 1	1.36646
202890_at	9053	MAP7	microtubule-associated protein 7	1.36425
238495_at	-	-	-	1.36328
207018_s_at	5874	RAB27B	RAB27B, member RAS oncogene family	1.36089
216841_s_at	6648	SOD2	superoxide dismutase 2, mitochondrial	1.36019
228115_at	-	-	-	1.35848
228988_at	7552	ZNF711	zinc finger protein 711	1.35632
225328_at	-	-	-	1.35546
241734_at	153443	SRFBP1	serum response factor binding protein 1	1.34877
223278_at	2706	GJB2	gap junction protein, beta 2, 26kDa	1.34596
229580_at	-	-	-	1.34085
222016_s_at	64288	ZNF323	zinc finger protein 323	1.34043
213401_s_at	6907	TBL1X	transducin (beta)-like 1X-linked	1.33889
235158_at	84928	TMEM209	transmembrane protein 209	1.33716
225180_at	151613	TTC14	tetratricopeptide repeat domain 14	1.33563
223608_at	84288	EFCAB2	EF-hand calcium binding domain 2	1.33187
203698_s_at	2487	FRZB	frizzled-related protein	1.32834
237333_at	81493	SYNC	syncoilin, intermediate filament protein	1.32757
226432_at	55500	ETNK1	ethanolamine kinase 1	1.3247
204584_at	3897	L1CAM	L1 cell adhesion molecule	1.32385
218559_s_at	9935	MAFB	v-maf musculoaponeurotic fibrosarcoma oncogene homolog B (avian)	1.32083
235610_at	91801	ALKBH8	alkB, alkylation repair homolog 8 (E. coli)	1.31867
219093_at	55022	PID1	phosphotyrosine interaction domain containing 1	1.31762
204472_at	2669	GEM	GTP binding protein overexpressed in skeletal muscle	1.31727
212148_at	5087	PBX1	pre-B-cell leukemia homeobox 1	1.31513
1565939_at	55322	C5orf22	chromosome 5 open reading frame 22	1.3149
204909_at	1656	DDX6	DEAD (Asp-Glu-Ala-Asp) box polypeptide 6	1.31397
1554067_at	144577	C12orf66	chromosome 12 open reading frame 66	1.31244
228949_at	79971	GPR177	G protein-coupled receptor 177	1.31055
206569_at	11009	IL24	interleukin 24	1.30896
238516_at	659	BMPR2	bone morphogenetic protein receptor, type II (serine/threonine kinase)	1.30481
230006_s_at	258010	SVIP	small VCP/p97-interacting protein	1.30433
219049_at	55790	CSGALNACT1	chondroitin sulfate N-acetylgalactosaminyltransferase 1	1.30256
221541_at	83716	CRISPLD2	cysteine-rich secretory protein LCCL domain containing 2	1.30082
222642_s_at	55161	TMEM33	transmembrane protein 33	1.30046
230790_x_at	-	-	-	1.29899
242434_at	-	-	-	1.2981
230243_at	93587	RG9MTD2	RNA (guanine-9-) methyltransferase domain containing 2	1.29637
206613_s_at	9015	TAF1A	TATA box binding protein (TBP)-associated factor, RNA polymerase I, A, 48kDa	1.29488
228974_at	-	-	-	1.29193
204621_s_at	4929	NR4A2	nuclear receptor subfamily 4, group A, member 2	1.29128
222163_s_at	79029	SPATA5L1	spermatogenesis associated 5-like 1	1.29022
227641_at	146330	FBXL16	F-box and leucine-rich repeat protein 16	1.28811
239437_at	-	-	-	1.28663
223511_at	83932	C1orf124	chromosome 1 open reading frame 124	1.28627
228655_at	-	-	-	1.28494
238867_at	130827	TMEM182	transmembrane protein 182	1.28452
219673_at	254394	MCM9	minichromosome maintenance complex component 9	1.28391
204237_at	51454	GULP1	GULP, engulfment adaptor PTB domain containing 1	1.28214
221872_at	5918	RARRES1	retinoic acid receptor responder (tazarotene induced) 1	1.28078
205190_at	5357	PLS1	plastin 1 (I isoform)	1.28075
211355_x_at	3953	LEPR	leptin receptor	1.28069
211478_s_at	1803	DPP4	dipeptidyl-peptidase 4	1.27848
232523_at	84466	MEGF10	multiple EGF-like-domains 10	1.278
1558605_at	-	-	-	1.2731
222309_at	81688	C6orf62	chromosome 6 open reading frame 62	1.27241
231969_at	56977	STOX2	storkhead box 2	1.2721
209875_s_at	6696	SPP1	secreted phosphoprotein 1	1.27062
203991_s_at	7403	UTX	ubiquitously transcribed tetratricopeptide repeat, X chromosome	1.27029
117_at	3310	HSPA6	heat shock 70kDa protein 6 (HSP70B')	1.26803
225937_at	-	-	-	1.26709
207426_s_at	7292	TNFSF4	tumor necrosis factor (ligand) superfamily, member 4	1.26602
241887_at	-	-	-	1.26554
215128_at	-	-	-	1.26417
237016_at	221468	TMEM217	transmembrane protein 217	1.26328
218826_at	54733	SLC35F2	solute carrier family 35, member F2	1.2619
210807_s_at	9194	SLC16A7	solute carrier family 16, member 7 (monocarboxylic acid transporter 2)	1.26176
204035_at	7857	SCG2	secretogranin II (chromogranin C)	1.26106
223251_s_at	55608	ANKRD10	ankyrin repeat domain 10	1.26043
230281_at	123775	C16orf46	chromosome 16 open reading frame 46	1.26002
214581_x_at	27242	TNFRSF21	tumor necrosis factor receptor superfamily, member 21	1.25988
239790_s_at	-	-	-	1.25719
231726_at	56122	PCDHB14	protocadherin beta 14	1.25547
229802_at	-	-	-	1.25461
226588_at	57703	KIAA1604	KIAA1604 protein	1.25282
1568574_x_at	6696	SPP1	secreted phosphoprotein 1	1.25249
1555882_at	169981	SPIN3	spindlin family, member 3	1.25125
238852_at	-	-	-	1.25095
203394_s_at	3280	HES1	hairy and enhancer of split 1, (Drosophila)	1.25015
240928_at	51077	FCF1	FCF1 small subunit (SSU) processome component homolog (S. cerevisiae)	1.24986
241912_at	730051	LOC730051	similar to hCG2044798	1.24635
221667_s_at	26353	HSPB8	heat shock 22kDa protein 8	1.24476
229435_at	169792	GLIS3	GLIS family zinc finger 3	1.24257
203177_x_at	7019	TFAM	transcription factor A, mitochondrial	1.24132
239587_at	-	-	-	1.24002
203959_s_at	9923	ZBTB40	zinc finger and BTB domain containing 40	1.23976
235940_at	84267	C9orf64	chromosome 9 open reading frame 64	1.23794
206752_s_at	1677	DFFB	DNA fragmentation factor, 40kDa, beta polypeptide (caspase-activated DNase)	1.23771
239768_x_at	-	-	-	1.23766
236899_at	729397	LOC729397	hypothetical LOC729397	1.23233
218678_at	10763	NES	nestin	1.23178
204506_at	5534	PPP3R1	protein phosphatase 3 (formerly 2B), regulatory subunit B, alpha isoform	1.22813
206796_at	8840	WISP1	WNT1 inducible signaling pathway protein 1	1.22699
236194_at	-	-	-	1.22538
202147_s_at	3475	IFRD1	interferon-related developmental regulator 1	1.22475
221477_s_at	79099	-	-	1.22451
216870_x_at	8847	DLEU2	deleted in lymphocytic leukemia 2 (non-protein coding)	1.22167
216228_s_at	11169	WDHD1	WD repeat and HMG-box DNA binding protein 1	1.22161
206314_at	55888	ZNF167	zinc finger protein 167	1.22118
223404_s_at	81627	C1orf25	chromosome 1 open reading frame 25	1.21867
205586_x_at	7425	VGF	VGF nerve growth factor inducible	1.21813
219178_at	79691	QTRTD1	queuine tRNA-ribosyltransferase domain containing 1	1.2152
228624_at	55314	TMEM144	transmembrane protein 144	1.21486
235668_at	639	PRDM1	PR domain containing 1, with ZNF domain	1.21293
1559343_at	6638	SNRPN	small nuclear ribonucleoprotein polypeptide N	1.21172
202565_s_at	6840	SVIL	supervillin	1.2116
209238_at	6809	STX3	syntaxin 3	1.20871
223642_at	7546	ZIC2	Zic family member 2 (odd-paired homolog, Drosophila)	1.20768
202638_s_at	3383	ICAM1	intercellular adhesion molecule 1	1.20354
213387_at	54454	ATAD2B	ATPase family, AAA domain containing 2B	1.20347
204024_at	734	OSGIN2	oxidative stress induced growth inhibitor family member 2	1.20294
206271_at	7098	TLR3	toll-like receptor 3	1.20191
206561_s_at	57016	AKR1B10	aldo-keto reductase family 1, member B10 (aldose reductase)	1.20074
222765_x_at	51575	ESF1	ESF1, nucleolar pre-rRNA processing protein, homolog (S. cerevisiae)	1.20046
231302_at	-	-	-	1.19857
205921_s_at	6533	SLC6A6	solute carrier family 6 (neurotransmitter transporter, taurine), member 6	1.19794
223130_s_at	29116	MYLIP	myosin regulatory light chain interacting protein	1.19778
206110_at	8357	HIST1H3H	histone cluster 1, H3h	1.19746
238660_at	23001	WDFY3	WD repeat and FYVE domain containing 3	1.19726
228365_at	144402	CPNE8	copine VIII	1.19699
236526_x_at	80006	C5orf44	chromosome 5 open reading frame 44	1.1967
203414_at	23531	MMD	monocyte to macrophage differentiation-associated	1.19661
204435_at	9818	NUPL1	nucleoporin like 1	1.19611
227765_at	-	-	-	1.19574
228642_at	-	-	-	1.19439
1568597_at	646762	LOC646762	hypothetical protein LOC646762	1.19383
209569_x_at	27065	D4S234E	DNA segment on chromosome 4 (unique) 234 expressed sequence	1.19378
212482_at	64795	RMND5A	required for meiotic nuclear division 5 homolog A (S. cerevisiae)	1.19212
236278_at	8353	HIST1H3E	histone cluster 1, H3e	1.19199
228248_at	253260	RICTOR	rapamycin-insensitive companion of mTOR	1.18955
244321_at	80055	PGAP1	post-GPI attachment to proteins 1	1.18825
213372_at	152559	PAQR3	progestin and adipoQ receptor family member III	1.1869
235159_at	-	-	-	1.18433
1560433_at	-	-	-	1.1823
232573_at	-	-	-	1.18161
225919_s_at	203228	C9orf72	chromosome 9 open reading frame 72	1.17945
211764_s_at	7321	UBE2D1	ubiquitin-conjugating enzyme E2D 1 (UBC4/5 homolog, yeast)	1.17591
204491_at	5144	PDE4D	phosphodiesterase 4D, cAMP-specific (phosphodiesterase E3 dunce homolog, Drosophila)	1.17522
234660_s_at	22894	DIS3	DIS3 mitotic control homolog (S. cerevisiae)	1.17481
235970_at	254251	LCORL	ligand dependent nuclear receptor corepressor-like	1.17435
215071_s_at	8334	HIST1H2AC	histone cluster 1, H2ac	1.1743
220147_s_at	58516	FAM60A	family with sequence similarity 60, member A	1.17424
243252_at	-	-	-	1.17424
228707_at	137075	CLDN23	claudin 23	1.17353
242224_at	55105	GPATCH2	G patch domain containing 2	1.17266
235443_at	100131067	LOC100131067	hypothetical protein LOC100131067	1.17225
222825_at	51633	OTUD6B	OTU domain containing 6B	1.16967
229700_at	148203	ZNF738	zinc finger protein 738	1.1693
238496_at	-	-	-	1.16751
228244_at	388552	BLOC1S3	biogenesis of lysosomal organelles complex-1, subunit 3	1.16689
205828_at	4314	MMP3	matrix metallopeptidase 3 (stromelysin 1, progelatinase)	1.16563
243278_at	93986	FOXP2	forkhead box P2	1.16449
228708_at	5874	RAB27B	RAB27B, member RAS oncogene family	1.16325
204291_at	9849	ZNF518A	zinc finger protein 518A	1.16226
234344_at	57826	RAP2C	RAP2C, member of RAS oncogene family	1.16142
239423_at	-	-	-	1.16001
244811_at	-	-	-	1.15734
227943_at	-	-	-	1.15643
229228_at	9586	CREB5	cAMP responsive element binding protein 5	1.15628
235550_at	79884	MAP9	microtubule-associated protein 9	1.15517
209433_s_at	5471	PPAT	phosphoribosyl pyrophosphate amidotransferase	1.15462
209674_at	1407	CRY1	cryptochrome 1 (photolyase-like)	1.15342
201582_at	10483	SEC23B	Sec23 homolog B (S. cerevisiae)	1.15226
228997_at	54952	TRNAU1AP	tRNA selenocysteine 1 associated protein 1	1.15169
218170_at	51015	ISOC1	isochorismatase domain containing 1	1.15154
219902_at	23743	BHMT2	betaine-homocysteine methyltransferase 2	1.15119
227772_at	-	-	-	1.15013
240191_at	125919	ZNF543	zinc finger protein 543	1.14687
218757_s_at	65109	UPF3B	UPF3 regulator of nonsense transcripts homolog B (yeast)	1.14643
204566_at	8493	PPM1D	protein phosphatase 1D magnesium-dependent, delta isoform	1.14495
1553274_a_at	154007	C6orf151	chromosome 6 open reading frame 151	1.14436
1554340_a_at	374946	C1orf187	chromosome 1 open reading frame 187	1.1436
235737_at	85480	TSLP	thymic stromal lymphopoietin	1.14355
235423_at	-	-	-	1.14312
222670_s_at	9935	MAFB	v-maf musculoaponeurotic fibrosarcoma oncogene homolog B (avian)	1.14123
1560048_at	-	-	-	1.14107
219982_s_at	8293	SERF1A	small EDRK-rich factor 1A (telomeric)	1.13969
218330_s_at	89797	NAV2	neuron navigator 2	1.1385
207528_s_at	23657	SLC7A11	solute carrier family 7, (cationic amino acid transporter, y+ system) member 11	1.13833
217738_at	10135	NAMPT	nicotinamide phosphoribosyltransferase	1.13784
239140_at	-	-	-	1.13779
230703_at	-	-	-	1.13773
214764_at	51018	RRP15	ribosomal RNA processing 15 homolog (S. cerevisiae)	1.13486
206976_s_at	10808	HSPH1	heat shock 105kDa/110kDa protein 1	1.13467
229491_at	133308	NHEDC2	Na+/H+ exchanger domain containing 2	1.13448
226534_at	4254	KITLG	KIT ligand	1.13431
231131_at	286499	FAM133A	family with sequence similarity 133, member A	1.13265
206115_at	1960	EGR3	early growth response 3	1.13254
219487_at	79738	BBS10	Bardet-Biedl syndrome 10	1.1312
214678_x_at	7543	ZFX	zinc finger protein, X-linked	1.13077
226341_at	-	-	-	1.12837
235210_s_at	157869	RPESP	RPE-spondin	1.12837
1558368_s_at	374946	C1orf187	chromosome 1 open reading frame 187	1.12706
222204_s_at	54700	RRN3	RRN3 RNA polymerase I transcription factor homolog (S. cerevisiae)	1.12553
242923_at	339500	ZNF678	zinc finger protein 678	1.12504
228010_at	5522	PPP2R2C	protein phosphatase 2 (formerly 2A), regulatory subunit B, gamma isoform	1.12229
225517_at	54989	ZNF770	zinc finger protein 770	1.12101
240105_at	-	-	-	1.1209
223144_s_at	55122	AKIRIN2	akirin 2	1.1209
1558445_at	-	-	-	1.12085
215081_at	23251	KIAA1024	KIAA1024	1.11911
236123_at	54879	ST7L	suppression of tumorigenicity 7 like	1.11877
218177_at	57132	CHMP1B	chromatin modifying protein 1B	1.11712
1557167_at	493812	HCG11	HLA complex group 11	1.11507
224047_at	-	-	-	1.11413
229711_s_at	84825	MGC5370	hypothetical protein MGC5370	1.11376
1554438_at	56243	KIAA1217	KIAA1217	1.11306
213427_at	10799	RPP40	ribonuclease P/MRP 40kDa subunit	1.10969
221524_s_at	58528	RRAGD	Ras-related GTP binding D	1.10919
1559190_s_at	112724	RDH13	retinol dehydrogenase 13 (all-trans/9-cis)	1.10863
242905_at	56902	PNO1	partner of NOB1 homolog (S. cerevisiae)	1.10796
219342_at	64921	CASD1	CAS1 domain containing 1	1.10796
228250_at	51735	RAPGEF6	Rap guanine nucleotide exchange factor (GEF) 6	1.10658
214608_s_at	2138	EYA1	eyes absent homolog 1 (Drosophila)	1.1056
202842_s_at	4189	DNAJB9	DnaJ (Hsp40) homolog, subfamily B, member 9	1.10507
227475_at	94234	FOXQ1	forkhead box Q1	1.10469
230333_at	-	-	-	1.10379
219874_at	84561	SLC12A8	solute carrier family 12 (potassium/chloride transporters), member 8	1.10366
242283_at	127602	DNAH14	dynein, axonemal, heavy chain 14	1.10327
224367_at	84707	BEX2	brain expressed X-linked 2	1.10305
202575_at	1382	CRABP2	cellular retinoic acid binding protein 2	1.10256
224308_s_at	57508	INTS2	integrator complex subunit 2	1.10214
233191_at	55680	RUFY2	RUN and FYVE domain containing 2	1.10197
230380_at	83591	THAP2	THAP domain containing, apoptosis associated protein 2	1.09993
229433_at	64062	RBM26	RNA binding motif protein 26	1.09985
228904_at	3213	HOXB3	homeobox B3	1.09962
228098_s_at	29116	MYLIP	myosin regulatory light chain interacting protein	1.09945
202241_at	10221	TRIB1	tribbles homolog 1 (Drosophila)	1.09931
231775_at	8797	TNFRSF10A	tumor necrosis factor receptor superfamily, member 10a	1.09921
218933_at	79029	SPATA5L1	spermatogenesis associated 5-like 1	1.0982
203140_at	604	BCL6	B-cell CLL/lymphoma 6	1.09715
218936_s_at	29080	CCDC59	coiled-coil domain containing 59	1.09692
210119_at	3772	KCNJ15	potassium inwardly-rectifying channel, subfamily J, member 15	1.09689
201566_x_at	3398	ID2	inhibitor of DNA binding 2, dominant negative helix-loop-helix protein	1.09665
244828_x_at	92345	NAF1	nuclear assembly factor 1 homolog (S. cerevisiae)	1.09665
202872_at	528	ATP6V1C1	ATPase, H+ transporting, lysosomal 42kDa, V1 subunit C1	1.09608
1555845_at	-	-	-	1.09574
1555883_s_at	169981	SPIN3	spindlin family, member 3	1.09521
1554384_at	11240	PADI2	peptidyl arginine deiminase, type II	1.09444
230031_at	3309	HSPA5	heat shock 70kDa protein 5 (glucose-regulated protein, 78kDa)	1.09356
219540_at	10308	ZNF267	zinc finger protein 267	1.09163
1564381_s_at	-	-	-	1.09155
233230_s_at	57606	SLAIN2	SLAIN motif family, member 2	1.09057
241775_at	-	-	-	1.08949
1554140_at	79819	WDR78	WD repeat domain 78	1.08905
227754_at	-	-	-	1.08863
228099_at	162972	ZNF550	zinc finger protein 550	1.08777
222270_at	57223	SMEK2	SMEK homolog 2, suppressor of mek1 (Dictyostelium)	1.08749
225345_s_at	-	-	-	1.08691
225265_at	5937	RBMS1	RNA binding motif, single stranded interacting protein 1	1.08681
212286_at	23253	ANKRD12	ankyrin repeat domain 12	1.08619
201925_s_at	1604	CD55	CD55 molecule, decay accelerating factor for complement (Cromer blood group)	1.08564
235337_at	-	-	-	1.08564
202510_s_at	7127	TNFAIP2	tumor necrosis factor, alpha-induced protein 2	1.08535
1557684_at	57335	ZNF286A	zinc finger protein 286A	1.08504
1557883_a_at	-	-	-	1.08472
200895_s_at	2288	FKBP4	FK506 binding protein 4, 59kDa	1.08462
229519_at	8087	FXR1	fragile X mental retardation, autosomal homolog 1	1.08375
235573_at	-	-	-	1.0837
226285_at	4076	CAPRIN1	cell cycle associated protein 1	1.08297
228941_at	144245	ALG10B	asparagine-linked glycosylation 10 homolog B (yeast, alpha-1,2-glucosyltransferase)	1.08105
236210_at	-	-	-	1.07982
244462_at	7767	ZNF224	zinc finger protein 224	1.0793
207724_s_at	6683	SPAST	spastin	1.07922
232165_at	83481	EPPK1	epiplakin 1	1.0791
213880_at	8549	LGR5	leucine-rich repeat-containing G protein-coupled receptor 5	1.07845
229125_at	163782	KANK4	KN motif and ankyrin repeat domains 4	1.07624
234311_s_at	85865	GTPBP10	GTP-binding protein 10 (putative)	1.07548
226541_at	84085	FBXO30	F-box protein 30	1.07433
239451_at	-	-	-	1.07428
219130_at	54482	CCDC76	coiled-coil domain containing 76	1.07397
227752_at	55304	SPTLC3	serine palmitoyltransferase, long chain base subunit 3	1.07392
222794_x_at	55149	PAPD1	PAP associated domain containing 1	1.07372
203634_s_at	1374	CPT1A	carnitine palmitoyltransferase 1A (liver)	1.07338
221230_s_at	51742	ARID4B	AT rich interactive domain 4B (RBP1-like)	1.07324
236097_at	-	-	-	1.07297
204385_at	8942	KYNU	kynureninase (L-kynurenine hydrolase)	1.0723
203611_at	7014	TERF2	telomeric repeat binding factor 2	1.07057
238717_at	-	-	-	1.07055
235878_at	9014	TAF1B	TATA box binding protein (TBP)-associated factor, RNA polymerase I, B, 63kDa	1.06974
204720_s_at	9829	DNAJC6	DnaJ (Hsp40) homolog, subfamily C, member 6	1.06966
241706_at	144402	CPNE8	copine VIII	1.06862
1553067_a_at	114814	GNRHR2	gonadotropin-releasing hormone (type 2) receptor 2	1.06824
235791_x_at	1105	CHD1	chromodomain helicase DNA binding protein 1	1.06799
234983_at	-	-	-	1.0677
205239_at	374	AREG	amphiregulin	1.06695
228753_at	100128737	LOC100128737	hypothetical protein LOC100128737	1.06695
227636_at	168451	THAP5	THAP domain containing 5	1.06666
223418_x_at	81573	ANKRD13C	ankyrin repeat domain 13C	1.06618
217739_s_at	10135	NAMPT	nicotinamide phosphoribosyltransferase	1.0661
239134_at	-	-	-	1.06561
206932_at	9023	CH25H	cholesterol 25-hydroxylase	1.06554
242979_at	3667	IRS1	insulin receptor substrate 1	1.06499
225760_at	114803	MYSM1	myb-like, SWIRM and MPN domains 1	1.06376
235203_at	-	-	-	1.06324
228694_at	-	-	-	1.0618
206167_s_at	395	ARHGAP6	Rho GTPase activating protein 6	1.06159
235017_s_at	-	-	-	1.06149
38892_at	23506	KIAA0240	KIAA0240	1.06106
225313_at	63939	C20orf177	chromosome 20 open reading frame 177	1.06105
235675_at	200895	DHFRL1	dihydrofolate reductase-like 1	1.06026
203203_s_at	11103	KRR1	KRR1, small subunit (SSU) processome component, homolog (yeast)	1.0601
217678_at	23657	SLC7A11	solute carrier family 7, (cationic amino acid transporter, y+ system) member 11	1.05978
226794_at	134957	STXBP5	syntaxin binding protein 5 (tomosyn)	1.05824
238919_at	-	-	-	1.05808
224610_at	23642	SNHG1	small nucleolar RNA host gene 1 (non-protein coding)	1.05785
206172_at	3598	IL13RA2	interleukin 13 receptor, alpha 2	1.05676
240237_at	-	-	-	1.05569
229091_s_at	54619	CCNJ	cyclin J	1.05442
232102_at	131965	METTL6	methyltransferase like 6	1.05401
235918_x_at	79598	CEP97	centrosomal protein 97kDa	1.0534
227766_at	3981	LIG4	ligase IV, DNA, ATP-dependent	1.05276
230875_s_at	23250	ATP11A	ATPase, class VI, type 11A	1.05211
229393_at	84456	L3MBTL3	l(3)mbt-like 3 (Drosophila)	1.05166
226374_at	-	-	-	1.05163
210676_x_at	84220	RGPD5	RANBP2-like and GRIP domain containing 5	1.05129
226832_at	-	-	-	1.04826
225830_at	118987	PDZD8	PDZ domain containing 8	1.04811
1566342_at	-	-	-	1.0477
206543_at	6595	SMARCA2	SWI/SNF related, matrix associated, actin dependent regulator of chromatin, subfamily a, member 2	1.04765
241310_at	-	-	-	1.04707
226208_at	57688	ZSWIM6	zinc finger, SWIM-type containing 6	1.04687
225956_at	153222	C5orf41	chromosome 5 open reading frame 41	1.04672
221903_s_at	1540	CYLD	cylindromatosis (turban tumor syndrome)	1.0464
232262_at	9487	PIGL	phosphatidylinositol glycan anchor biosynthesis, class L	1.04592
229298_at	84078	KBTBD7	kelch repeat and BTB (POZ) domain containing 7	1.04545
239250_at	147947	ZNF542	zinc finger protein 542	1.04501
236626_at	-	-	-	1.04483
207017_at	5874	RAB27B	RAB27B, member RAS oncogene family	1.04397
238733_at	-	-	-	1.0428
204404_at	6558	SLC12A2	solute carrier family 12 (sodium/potassium/chloride transporters), member 2	1.04272
206557_at	79986	ZNF702P	zinc finger protein 702 pseudogene	1.04075
235521_at	3200	HOXA3	homeobox A3	1.04062
205018_s_at	10150	MBNL2	muscleblind-like 2 (Drosophila)	1.0405
207850_at	2921	CXCL3	chemokine (C-X-C motif) ligand 3	1.04005
223475_at	83690	CRISPLD1	cysteine-rich secretory protein LCCL domain containing 1	1.03866
1553141_at	144811	C13orf31	chromosome 13 open reading frame 31	1.03845
221897_at	84851	TRIM52	tripartite motif-containing 52	1.03838
235577_at	22834	ZNF652	zinc finger protein 652	1.03823
239912_at	-	-	-	1.03761
226375_at	-	-	-	1.03738
228106_at	54876	C4orf30	chromosome 4 open reading frame 30	1.03693
204235_s_at	51454	GULP1	GULP, engulfment adaptor PTB domain containing 1	1.03684
205427_at	6940	ZNF354A	zinc finger protein 354A	1.03551
243790_at	199704	ZNF585A	zinc finger protein 585A	1.03502
1558014_s_at	84188	FAR1	fatty acyl CoA reductase 1	1.03494
218116_at	51759	C9orf78	chromosome 9 open reading frame 78	1.03444
218590_at	56652	C10orf2	chromosome 10 open reading frame 2	1.03434
210379_s_at	9874	TLK1	tousled-like kinase 1	1.03289
225888_at	80018	C12orf30	chromosome 12 open reading frame 30	1.03269
213320_at	10196	PRMT3	protein arginine methyltransferase 3	1.03251
222562_s_at	80351	TNKS2	tankyrase, TRF1-interacting ankyrin-related ADP-ribose polymerase 2	1.03199
221218_s_at	27010	TPK1	thiamin pyrophosphokinase 1	1.03083
232999_at	-	-	-	1.0302
227689_at	7770	ZNF227	zinc finger protein 227	1.03004
237914_s_at	-	-	-	1.02962
232024_at	26157	GIMAP2	GTPase, IMAP family member 2	1.02905
210705_s_at	85363	TRIM5	tripartite motif-containing 5	1.02874
209959_at	8013	NR4A3	nuclear receptor subfamily 4, group A, member 3	1.02856
51228_at	389677	RBM12B	RNA binding motif protein 12B	1.02843
228841_at	90624	LYRM7	Lyrm7 homolog (mouse)	1.02836
209791_at	11240	PADI2	peptidyl arginine deiminase, type II	1.02802
242140_at	-	-	-	1.0279
223467_at	51655	RASD1	RAS, dexamethasone-induced 1	1.02698
232618_at	246126	CYorf15A	chromosome Y open reading frame 15A	1.02697
225594_at	58487	CREBZF	CREB/ATF bZIP transcription factor	1.0262
214193_s_at	27042	C1orf107	chromosome 1 open reading frame 107	1.02597
226387_at	222194	RSBN1L	round spermatid basic protein 1-like	1.02437
241933_at	55278	QRSL1	glutaminyl-tRNA synthase (glutamine-hydrolyzing)-like 1	1.02413
218603_at	51696	HECA	headcase homolog (Drosophila)	1.02338
243529_at	92935	2002-03-01	methionyl-tRNA synthetase 2, mitochondrial	1.02252
212367_at	10116	FEM1B	fem-1 homolog b (C. elegans)	1.02227
235147_at	-	-	-	1.02129
228029_at	170960	ZNF721	zinc finger protein 721	1.02063
242523_at	-	-	-	1.02045
229285_at	6041	RNASEL	ribonuclease L (2',5'-oligoisoadenylate synthetase-dependent)	1.02024
225914_s_at	81617	CAB39L	calcium binding protein 39-like	1.02008
219387_at	55704	CCDC88A	coiled-coil domain containing 88A	1.01973
229359_at	-	-	-	1.0188
220145_at	79884	MAP9	microtubule-associated protein 9	1.01878
202445_s_at	4853	NOTCH2	Notch homolog 2 (Drosophila)	1.01811
208891_at	1848	DUSP6	dual specificity phosphatase 6	1.01751
206140_at	9355	LHX2	LIM homeobox 2	1.01711
239760_at	-	-	-	1.01705
229327_s_at	-	-	-	1.01665
209242_at	5178	PEG3	paternally expressed 3	1.01535
227953_at	-	-	-	1.01507
228996_at	149041	RC3H1	ring finger and CCCH-type zinc finger domains 1	1.01499
1553815_a_at	170082	LOC170082	TFIIS central domain-containing protein 1	1.01468
226337_at	92344	SCYL1BP1	SCY1-like 1 binding protein 1	1.014
238890_at	8624	PSMG1	proteasome (prosome, macropain) assembly chaperone 1	1.01316
212812_at	-	-	-	1.01307
218871_x_at	55454	CSGALNACT2	chondroitin sulfate N-acetylgalactosaminyltransferase 2	1.01277
218882_s_at	10885	WDR3	WD repeat domain 3	1.01261
230779_at	23112	TNRC6B	trinucleotide repeat containing 6B	1.01259
233555_s_at	55959	SULF2	sulfatase 2	1.01252
202430_s_at	5359	PLSCR1	phospholipid scramblase 1	1.01175
215172_at	26095	PTPN20B	protein tyrosine phosphatase, non-receptor type 20B	1.01165
223225_s_at	81929	SEH1L	SEH1-like (S. cerevisiae)	1.01151
227931_at	54891	INO80D	INO80 complex subunit D	1.01144
1567214_a_at	5411	PNN	pinin, desmosome associated protein	1.01075
231508_s_at	-	-	-	1.00982
202293_at	10274	STAG1	stromal antigen 1	1.00965
218326_s_at	55366	LGR4	leucine-rich repeat-containing G protein-coupled receptor 4	1.00962
221245_s_at	7855	FZD5	frizzled homolog 5 (Drosophila)	1.00911
204897_at	5734	PTGER4	prostaglandin E receptor 4 (subtype EP4)	1.00902
219648_at	55686	MREG	melanoregulin	1.00827
228647_at	100049716	LOC100049716	hypothetical protein LOC100049716	1.00778
235497_at	643837	LOC643837	hypothetical LOC643837	1.00708
211302_s_at	5142	PDE4B	phosphodiesterase 4B, cAMP-specific (phosphodiesterase E4 dunce homolog, Drosophila)	1.00688
239252_at	-	-	-	1.00576
44783_s_at	23462	HEY1	hairy/enhancer-of-split related with YRPW motif 1	1.00556
223300_s_at	79780	CCDC82	coiled-coil domain containing 82	1.0052
226828_s_at	26508	HEYL	hairy/enhancer-of-split related with YRPW motif-like	1.00467
235125_x_at	374986	FAM73A	family with sequence similarity 73, member A	1.00456
219230_at	55273	TMEM100	transmembrane protein 100	1.00413
226924_at	400657	LOC400657	hypothetical LOC400657	1.00398
238686_at	26273	FBXO3	F-box protein 3	1.00336
224037_at	100129865	LOC100129865	similar to PRO1405	1.00289
213390_at	23211	ZC3H4	zinc finger CCCH-type containing 4	1.00248
224489_at	284058	KIAA1267	KIAA1267	1.00081
36920_at	4534	MTM1	myotubularin 1	1.00067
1569362_at	-	-	-	1.0002
225571_at	3977	LIFR	leukemia inhibitory factor receptor alpha	1.00015
203852_s_at	6606	SMN1	survival of motor neuron 1, telomeric	1.00007
List of genes repressed by SYT-SSX1 expression in human MSCs batch 1
probeset	entrez	gene_symbol	description	M
230710_at	-	-	-	-3.76008
215704_at	2312	FLG	filaggrin	-3.00213
202870_s_at	991	CDC20	cell division cycle 20 homolog (S. cerevisiae)	-2.94151
236480_at	-	-	-	-2.91461
1569263_at	-	-	-	-2.85612
205475_at	11341	SCRG1	scrapie responsive protein 1	-2.69574
202856_s_at	9123	SLC16A3	solute carrier family 16, member 3 (monocarboxylic acid transporter 4)	-2.65916
206632_s_at	9582	APOBEC3B	apolipoprotein B mRNA editing enzyme, catalytic polypeptide-like 3B	-2.54477
204320_at	1301	COL11A1	collagen, type XI, alpha 1	-2.5124
204348_s_at	205	AK3L1	adenylate kinase 3-like 1	-2.47823
227337_at	353322	ANKRD37	ankyrin repeat domain 37	-2.42716
202718_at	3485	IGFBP2	insulin-like growth factor binding protein 2, 36kDa	-2.39063
229127_at	58494	JAM2	junctional adhesion molecule 2	-2.38448
219888_at	6676	SPAG4	sperm associated antigen 4	-2.37999
46142_at	64788	LMF1	lipase maturation factor 1	-2.37103
238949_at	153830	RNF145	ring finger protein 145	-2.31077
239879_at	284998	LOC284998	hypothetical protein LOC284998	-2.30597
205159_at	1439	CSF2RB	colony stimulating factor 2 receptor, beta, low-affinity (granulocyte-macrophage)	-2.25388
37892_at	1301	COL11A1	collagen, type XI, alpha 1	-2.20343
202338_at	7083	TK1	thymidine kinase 1, soluble	-2.17239
209822_s_at	7436	VLDLR	very low density lipoprotein receptor	-2.16094
229271_x_at	1301	COL11A1	collagen, type XI, alpha 1	-2.15365
202847_at	5106	PCK2	phosphoenolpyruvate carboxykinase 2 (mitochondrial)	-2.10776
226437_at	90522	YIF1B	Yip1 interacting factor homolog B (S. cerevisiae)	-2.103
223216_x_at	55893	ZNF395	zinc finger protein 395	-2.09866
219213_at	58494	JAM2	junctional adhesion molecule 2	-2.09336
202580_x_at	2305	FOXM1	forkhead box M1	-2.05784
201848_s_at	664	BNIP3	BCL2/adenovirus E1B 19kDa interacting protein 3	-2.05525
217478_s_at	3108	HLA-DMA	major histocompatibility complex, class II, DM alpha	-2.03606
203028_s_at	1535	CYBA	cytochrome b-245, alpha polypeptide	-2.01319
232693_s_at	55893	ZNF395	zinc finger protein 395	-1.97915
212647_at	6237	RRAS	related RAS viral (r-ras) oncogene homolog	-1.97792
217871_s_at	4282	MIF	macrophage migration inhibitory factor (glycosylation-inhibiting factor)	-1.95919
203766_s_at	25802	LMOD1	leiomodin 1 (smooth muscle)	-1.95552
202803_s_at	3689	ITGB2	integrin, beta 2 (complement component 3 receptor 3 and 4 subunit)	-1.95368
223062_s_at	29968	PSAT1	phosphoserine aminotransferase 1	-1.9516
225342_at	205	AK3L1	adenylate kinase 3-like 1	-1.94127
202096_s_at	706	TSPO	translocator protein (18kDa)	-1.93224
223318_s_at	84266	ALKBH7	alkB, alkylation repair homolog 7 (E. coli)	-1.92403
1555758_a_at	1033	CDKN3	cyclin-dependent kinase inhibitor 3	-1.89665
213802_at	-	-	-	-1.88907
226452_at	5163	PDK1	pyruvate dehydrogenase kinase, isozyme 1	-1.8772
221539_at	1978	EIF4EBP1	eukaryotic translation initiation factor 4E binding protein 1	-1.84477
225895_at	171024	SYNPO2	synaptopodin 2	-1.8429
202465_at	5118	PCOLCE	procollagen C-endopeptidase enhancer	-1.8289
218934_s_at	27129	HSPB7	heat shock 27kDa protein family, member 7 (cardiovascular)	-1.81537
1554553_s_at	90522	YIF1B	Yip1 interacting factor homolog B (S. cerevisiae)	-1.80964
219918_s_at	259266	ASPM	asp (abnormal spindle) homolog, microcephaly associated (Drosophila)	-1.8094
209773_s_at	6241	RRM2	ribonucleotide reductase M2 polypeptide	-1.80228
218145_at	57761	TRIB3	tribbles homolog 3 (Drosophila)	-1.80006
218387_s_at	25796	PGLS	6-phosphogluconolactonase	-1.78909
201850_at	822	CAPG	capping protein (actin filament), gelsolin-like	-1.787
220639_at	79853	TM4SF20	transmembrane 4 L six family member 20	-1.78532
218388_at	25796	PGLS	6-phosphogluconolactonase	-1.78481
201673_s_at	2997	GYS1	glycogen synthase 1 (muscle)	-1.77956
202888_s_at	290	ANPEP	alanyl (membrane) aminopeptidase	-1.77471
202022_at	230	ALDOC	aldolase C, fructose-bisphosphate	-1.75864
204595_s_at	6781	STC1	stanniocalcin 1	-1.75675
213041_s_at	513	ATP5D	ATP synthase, H+ transporting, mitochondrial F1 complex, delta subunit	-1.74377
218206_x_at	51282	SCAND1	SCAN domain containing 1	-1.74317
202998_s_at	4017	LOXL2	lysyl oxidase-like 2	-1.74188
203764_at	9787	DLGAP5	discs, large (Drosophila) homolog-associated protein 5	-1.74085
203524_s_at	4357	MPST	mercaptopyruvate sulfurtransferase	-1.7329
227186_s_at	64975	MRPL41	mitochondrial ribosomal protein L41	-1.72113
219878_s_at	51621	KLF13	Kruppel-like factor 13	-1.72039
201058_s_at	10398	MYL9	myosin, light chain 9, regulatory	-1.72025
206969_at	3885	KRT34	keratin 34	-1.71169
232652_x_at	51282	SCAND1	SCAN domain containing 1	-1.70067
200827_at	5351	PLOD1	procollagen-lysine 1, 2-oxoglutarate 5-dioxygenase 1	-1.69196
204347_at	205	AK3L1	adenylate kinase 3-like 1	-1.69013
227868_at	154761	LOC154761	hypothetical LOC154761	-1.68477
218944_at	65263	PYCRL	pyrroline-5-carboxylate reductase-like	-1.66782
212816_s_at	875	CBS	cystathionine-beta-synthase	-1.66718
205112_at	51196	PLCE1	phospholipase C, epsilon 1	-1.65559
218149_s_at	55893	ZNF395	zinc finger protein 395	-1.65097
206686_at	5163	PDK1	pyruvate dehydrogenase kinase, isozyme 1	-1.64886
225898_at	84058	WDR54	WD repeat domain 54	-1.64884
204608_at	435	ASL	argininosuccinate lyase	-1.64695
231597_x_at	-	-	-	-1.64438
239370_at	-	-	-	-1.64358
209891_at	57405	SPC25	SPC25, NDC80 kinetochore complex component, homolog (S. cerevisiae)	-1.6413
201397_at	26227	PHGDH	phosphoglycerate dehydrogenase	-1.63606
201264_at	11316	COPE	coatomer protein complex, subunit epsilon	-1.63465
209365_s_at	1893	ECM1	extracellular matrix protein 1	-1.63434
228323_at	57082	CASC5	cancer susceptibility candidate 5	-1.63401
201292_at	7153	TOP2A	topoisomerase (DNA) II alpha 170kDa	-1.62911
203145_at	10615	SPAG5	sperm associated antigen 5	-1.62543
217452_s_at	8707	B3GALT2	UDP-Gal:betaGlcNAc beta 1,3-galactosyltransferase, polypeptide 2	-1.62418
209605_at	7263	TST	thiosulfate sulfurtransferase (rhodanese)	-1.62315
223734_at	84709	OSAP	ovary-specific acidic protein	-1.62302
210121_at	8707	B3GALT2	UDP-Gal:betaGlcNAc beta 1,3-galactosyltransferase, polypeptide 2	-1.62009
203570_at	4016	LOXL1	lysyl oxidase-like 1	-1.61282
218542_at	55165	CEP55	centrosomal protein 55kDa	-1.6089
202095_s_at	332	BIRC5	baculoviral IAP repeat-containing 5	-1.60597
203719_at	2067	ERCC1	excision repair cross-complementing rodent repair deficiency, complementation group 1 (includes overlapping antisense sequence)	-1.60468
243645_at	23114	NFASC	neurofascin homolog (chicken)	-1.59932
203963_at	771	CA12	carbonic anhydrase XII	-1.594
212191_x_at	6137	RPL13	ribosomal protein L13	-1.59199
205047_s_at	440	ASNS	asparagine synthetase	-1.59155
218663_at	64151	NCAPG	non-SMC condensin I complex, subunit G	-1.59033
220093_at	84168	ANTXR1	anthrax toxin receptor 1	-1.58769
205547_s_at	6876	TAGLN	transgelin	-1.58359
210220_at	2535	FZD2	frizzled homolog 2 (Drosophila)	-1.58239
221710_x_at	55194	FAM176B	family with sequence similarity 176, member B	-1.57941
210046_s_at	3418	IDH2	isocitrate dehydrogenase 2 (NADP+), mitochondrial	-1.5788
205941_s_at	1300	COL10A1	collagen, type X, alpha 1	-1.57768
230630_at	-	-	-	-1.57534
209728_at	3126	HLA-DRB4	major histocompatibility complex, class II, DR beta 4	-1.57081
229538_s_at	128239	IQGAP3	IQ motif containing GTPase activating protein 3	-1.56762
211991_s_at	3113	HLA-DPA1	major histocompatibility complex, class II, DP alpha 1	-1.56725
203720_s_at	2067	ERCC1	excision repair cross-complementing rodent repair deficiency, complementation group 1 (includes overlapping antisense sequence)	-1.56709
218051_s_at	64943	NT5DC2	5'-nucleotidase domain containing 2	-1.56614
216080_s_at	3995	FADS3	fatty acid desaturase 3	-1.55983
230290_at	222663	SCUBE3	signal peptide, CUB domain, EGF-like 3	-1.55853
210640_s_at	2852	GPER	G protein-coupled estrogen receptor 1	-1.55821
228499_at	5210	PFKFB4	6-phosphofructo-2-kinase/fructose-2,6-biphosphatase 4	-1.55566
226523_at	6876	TAGLN	transgelin	-1.55333
223532_at	51239	ANKRD39	ankyrin repeat domain 39	-1.55047
202954_at	11065	UBE2C	ubiquitin-conjugating enzyme E2C	-1.55039
209356_x_at	30008	EFEMP2	EGF-containing fibulin-like extracellular matrix protein 2	-1.54776
205493_s_at	10570	DPYSL4	dihydropyrimidinase-like 4	-1.54761
201755_at	4174	MCM5	minichromosome maintenance complex component 5	-1.54254
204052_s_at	6424	SFRP4	secreted frizzled-related protein 4	-1.5423
227727_at	219928	MRGPRF	MAS-related GPR, member F	-1.52816
209714_s_at	1033	CDKN3	cyclin-dependent kinase inhibitor 3	-1.52688
202177_at	2621	GAS6	growth arrest-specific 6	-1.52419
238996_x_at	226	ALDOA	aldolase A, fructose-bisphosphate	-1.52365
201474_s_at	3675	ITGA3	integrin, alpha 3 (antigen CD49C, alpha 3 subunit of VLA-3 receptor)	-1.52305
201792_at	165	AEBP1	AE binding protein 1	-1.51774
209215_at	10227	MFSD10	major facilitator superfamily domain containing 10	-1.5148
229459_at	25817	FAM19A5	family with sequence similarity 19 (chemokine (C-C motif)-like), member A5	-1.50913
213010_at	112464	PRKCDBP	protein kinase C, delta binding protein	-1.50911
1555826_at	8475	EPR1	effector cell peptidase receptor 1 (non-protein coding)	-1.50851
201245_s_at	55611	OTUB1	OTU domain, ubiquitin aldehyde binding 1	-1.50723
202030_at	10295	BCKDK	branched chain ketoacid dehydrogenase kinase	-1.50658
223541_at	3038	HAS3	hyaluronan synthase 3	-1.50248
231879_at	1303	COL12A1	collagen, type XII, alpha 1	-1.50067
1553972_a_at	875	CBS	cystathionine-beta-synthase	-1.49901
221123_x_at	55893	ZNF395	zinc finger protein 395	-1.49617
225418_at	5819	PVRL2	poliovirus receptor-related 2 (herpesvirus entry mediator B)	-1.48985
219135_s_at	64788	LMF1	lipase maturation factor 1	-1.48756
204430_s_at	6518	SLC2A5	solute carrier family 2 (facilitated glucose/fructose transporter), member 5	-1.48479
235545_at	55635	DEPDC1	DEP domain containing 1	-1.4772
213166_x_at	80097	FAM128B	family with sequence similarity 128, member B	-1.4761
202418_at	10897	YIF1A	Yip1 interacting factor homolog A (S. cerevisiae)	-1.47478
203022_at	10535	RNASEH2A	ribonuclease H2, subunit A	-1.47447
219978_s_at	51203	NUSAP1	nucleolar and spindle associated protein 1	-1.47176
219360_s_at	54795	TRPM4	transient receptor potential cation channel, subfamily M, member 4	-1.46976
201655_s_at	3339	HSPG2	heparan sulfate proteoglycan 2	-1.4672
219493_at	79801	SHCBP1	SHC SH2-domain binding protein 1	-1.46614
202771_at	9780	FAM38A	family with sequence similarity 38, member A	-1.46283
225795_at	91689	C22orf32	chromosome 22 open reading frame 32	-1.45986
208851_s_at	7070	THY1	Thy-1 cell surface antigen	-1.4504
206825_at	5021	OXTR	oxytocin receptor	-1.45005
211062_s_at	8532	CPZ	carboxypeptidase Z	-1.44542
203186_s_at	6275	S100A4	S100 calcium binding protein A4	-1.444
209263_x_at	7106	TSPAN4	tetraspanin 4	-1.44167
202705_at	9133	CCNB2	cyclin B2	-1.44084
225175_s_at	57153	SLC44A2	solute carrier family 44, member 2	-1.43648
201295_s_at	26118	WSB1	WD repeat and SOCS box-containing 1	-1.43609
238750_at	-	-	-	-1.4334
201809_s_at	2022	ENG	endoglin	-1.42499
208483_x_at	3883	KRT33A	keratin 33A	-1.42453
216237_s_at	4174	MCM5	minichromosome maintenance complex component 5	-1.42323
202283_at	5176	SERPINF1	serpin peptidase inhibitor, clade F (alpha-2 antiplasmin, pigment epithelium derived factor), member 1	-1.42302
201250_s_at	6513	SLC2A1	solute carrier family 2 (facilitated glucose transporter), member 1	-1.42132
223381_at	83540	NUF2	NUF2, NDC80 kinetochore complex component, homolog (S. cerevisiae)	-1.41974
210372_s_at	7164	TPD52L1	tumor protein D52-like 1	-1.41614
225590_at	57630	SH3RF1	SH3 domain containing ring finger 1	-1.41573
218679_s_at	51160	VPS28	vacuolar protein sorting 28 homolog (S. cerevisiae)	-1.4157
229490_s_at	-	-	-	-1.41433
227145_at	84171	LOXL4	lysyl oxidase-like 4	-1.40972
204306_s_at	977	CD151	CD151 molecule (Raph blood group)	-1.40826
1552619_a_at	54443	ANLN	anillin, actin binding protein	-1.4061
201102_s_at	5211	PFKL	phosphofructokinase, liver	-1.40546
201105_at	3956	LGALS1	lectin, galactoside-binding, soluble, 1	-1.40473
207165_at	3161	HMMR	hyaluronan-mediated motility receptor (RHAMM)	-1.40472
207828_s_at	1063	CENPF	centromere protein F, 350/400ka (mitosin)	-1.40211
218384_at	23589	CARHSP1	calcium regulated heat stable protein 1, 24kDa	-1.40132
218308_at	10460	TACC3	transforming, acidic coiled-coil containing protein 3	-1.40131
213765_at	8076	MFAP5	microfibrillar associated protein 5	-1.40103
226731_at	53918	PELO	pelota homolog (Drosophila)	-1.39957
201313_at	2026	ENO2	enolase 2 (gamma, neuronal)	-1.39675
209982_s_at	9379	NRXN2	neurexin 2	-1.39672
204805_s_at	8971	H1FX	H1 histone family, member X	-1.39648
205525_at	800	CALD1	caldesmon 1	-1.39303
236641_at	9928	KIF14	kinesin family member 14	-1.38987
202855_s_at	9123	SLC16A3	solute carrier family 16, member 3 (monocarboxylic acid transporter 4)	-1.38957
218009_s_at	9055	PRC1	protein regulator of cytokinesis 1	-1.38915
212843_at	4684	NCAM1	neural cell adhesion molecule 1	-1.38388
202503_s_at	9768	KIAA0101	KIAA0101	-1.38174
227850_x_at	148170	CDC42EP5	CDC42 effector protein (Rho GTPase binding) 5	-1.37949
209037_s_at	10938	EHD1	EH-domain containing 1	-1.37827
244787_at	-	-	-	-1.37599
221418_s_at	10025	MED16	mediator complex subunit 16	-1.37498
211752_s_at	374291	NDUFS7	NADH dehydrogenase (ubiquinone) Fe-S protein 7, 20kDa (NADH-coenzyme Q reductase)	-1.37482
236028_at	3381	IBSP	integrin-binding sialoprotein	-1.37431
200823_x_at	6159	RPL29	ribosomal protein L29	-1.37387
231766_s_at	1303	COL12A1	collagen, type XII, alpha 1	-1.36664
218162_at	56944	OLFML3	olfactomedin-like 3	-1.36169
208932_at	5531	PPP4C	protein phosphatase 4 (formerly X), catalytic subunit	-1.36159
224301_x_at	55766	H2AFJ	H2A histone family, member J	-1.35968
203686_at	4350	MPG	N-methylpurine-DNA glycosylase	-1.35777
233350_s_at	51368	TEX264	testis expressed 264	-1.35771
203136_at	10567	RABAC1	Rab acceptor 1 (prenylated)	-1.35452
210794_s_at	55384	MEG3	maternally expressed 3 (non-protein coding)	-1.35194
200785_s_at	4035	LRP1	low density lipoprotein-related protein 1 (alpha-2-macroglobulin receptor)	-1.35122
219709_x_at	65990	FAM173A	family with sequence similarity 173, member A	-1.34755
225767_at	-	-	-	-1.34398
223349_s_at	666	BOK	BCL2-related ovarian killer	-1.34338
229269_x_at	170463	SSBP4	single stranded DNA binding protein 4	-1.3427
200966_x_at	226	ALDOA	aldolase A, fructose-bisphosphate	-1.34179
219922_s_at	4054	LTBP3	latent transforming growth factor beta binding protein 3	-1.34041
1554600_s_at	4000	LMNA	lamin A/C	-1.34
200885_at	389	RHOC	ras homolog gene family, member C	-1.33908
205158_at	6038	RNASE4	ribonuclease, RNase A family, 4	-1.33745
201841_s_at	3315	HSPB1	heat shock 27kDa protein 1	-1.33705
39729_at	7001	PRDX2	peroxiredoxin 2	-1.33686
204824_at	2021	ENDOG	endonuclease G	-1.33685
202587_s_at	203	AK1	adenylate kinase 1	-1.33528
213011_s_at	7167	TPI1	triosephosphate isomerase 1	-1.33137
203919_at	6919	TCEA2	transcription elongation factor A (SII), 2	-1.32967
227878_s_at	84266	ALKBH7	alkB, alkylation repair homolog 7 (E. coli)	-1.3262
200986_at	710	SERPING1	serpin peptidase inhibitor, clade G (C1 inhibitor), member 1	-1.32491
220134_x_at	55194	FAM176B	family with sequence similarity 176, member B	-1.32481
203270_at	1841	DTYMK	deoxythymidylate kinase (thymidylate kinase)	-1.32339
236632_at	646576	LOC646576	hypothetical LOC646576	-1.3221
AFFX-HUMGAPDH/M33197_5_at	2597	GAPDH	glyceraldehyde-3-phosphate dehydrogenase	-1.32183
205924_at	5865	RAB3B	RAB3B, member RAS oncogene family	-1.32027
219602_s_at	63895	FAM38B	family with sequence similarity 38, member B	-1.32021
204927_at	8045	RASSF7	Ras association (RalGDS/AF-6) domain family (N-terminal) member 7	-1.31919
212734_x_at	6137	RPL13	ribosomal protein L13	-1.31892
209759_s_at	1632	DCI	dodecenoyl-Coenzyme A delta isomerase (3,2 trans-enoyl-Coenzyme A isomerase)	-1.31686
236270_at	4776	NFATC4	nuclear factor of activated T-cells, cytoplasmic, calcineurin-dependent 4	-1.31477
227998_at	140576	S100A16	S100 calcium binding protein A16	-1.31363
217234_s_at	7430	EZR	ezrin	-1.31185
202887_s_at	54541	DDIT4	DNA-damage-inducible transcript 4	-1.30964
202755_s_at	2817	GPC1	glypican 1	-1.30594
223293_at	84219	WDR24	WD repeat domain 24	-1.30509
229759_s_at	79674	VEPH1	ventricular zone expressed PH domain homolog 1 (zebrafish)	-1.30471
203411_s_at	4000	LMNA	lamin A/C	-1.30165
203417_at	4237	MFAP2	microfibrillar-associated protein 2	-1.30073
223226_x_at	170463	SSBP4	single stranded DNA binding protein 4	-1.30015
225721_at	171024	SYNPO2	synaptopodin 2	-1.29713
220917_s_at	57728	WDR19	WD repeat domain 19	-1.29663
209772_s_at	934	-	-	-1.29483
206766_at	8515	ITGA10	integrin, alpha 10	-1.29449
213942_at	1953	MEGF6	multiple EGF-like-domains 6	-1.29374
213252_at	9644	SH3PXD2A	SH3 and PX domains 2A	-1.29363
202910_s_at	976	CD97	CD97 molecule	-1.29328
238444_at	114991	ZNF618	zinc finger protein 618	-1.2924
218592_s_at	27440	CECR5	cat eye syndrome chromosome region, candidate 5	-1.29198
213782_s_at	51778	MYOZ2	myozenin 2	-1.29131
222899_at	22801	ITGA11	integrin, alpha 11	-1.28892
227320_at	144347	FAM101A	family with sequence similarity 101, member A	-1.2879
201849_at	664	BNIP3	BCL2/adenovirus E1B 19kDa interacting protein 3	-1.28756
205798_at	3575	IL7R	interleukin 7 receptor	-1.28632
218380_at	22861	NLRP1	NLR family, pyrin domain containing 1	-1.28579
214437_s_at	6472	SHMT2	serine hydroxymethyltransferase 2 (mitochondrial)	-1.28541
220892_s_at	29968	PSAT1	phosphoserine aminotransferase 1	-1.28455
210534_s_at	27077	B9D1	B9 protein domain 1	-1.28429
219956_at	11226	GALNT6	UDP-N-acetyl-alpha-D-galactosamine:polypeptide N-acetylgalactosaminyltransferase 6 (GalNAc-T6)	-1.28216
224345_x_at	26355	FAM162A	family with sequence similarity 162, member A	-1.2819
AFFX-ThrX-3_at	-	-	-	-1.28173
221938_x_at	10025	MED16	mediator complex subunit 16	-1.28119
203755_at	701	BUB1B	BUB1 budding uninhibited by benzimidazoles 1 homolog beta (yeast)	-1.27833
202201_at	645	BLVRB	biliverdin reductase B (flavin reductase (NADPH))	-1.27355
206050_s_at	6050	RNH1	ribonuclease/angiogenin inhibitor 1	-1.27329
208682_s_at	10916	MAGED2	melanoma antigen family D, 2	-1.27213
219845_at	56033	BARX1	BARX homeobox 1	-1.27155
208894_at	3122	HLA-DRA	major histocompatibility complex, class II, DR alpha	-1.27062
214687_x_at	226	ALDOA	aldolase A, fructose-bisphosphate	-1.27042
201149_s_at	7078	TIMP3	TIMP metallopeptidase inhibitor 3	-1.27041
215193_x_at	3119	HLA-DQB1	major histocompatibility complex, class II, DQ beta 1	-1.26729
212086_x_at	4000	LMNA	lamin A/C	-1.26715
234954_at	-	-	-	-1.26663
218070_s_at	29926	GMPPA	GDP-mannose pyrophosphorylase A	-1.26617
204443_at	410	ARSA	arylsulfatase A	-1.26381
212775_at	23363	OBSL1	obscurin-like 1	-1.26169
213746_s_at	2316	FLNA	filamin A, alpha (actin binding protein 280)	-1.26126
217600_at	222663	SCUBE3	signal peptide, CUB domain, EGF-like 3	-1.26049
202570_s_at	22839	DLGAP4	discs, large (Drosophila) homolog-associated protein 4	-1.26027
209264_s_at	7106	TSPAN4	tetraspanin 4	-1.25832
205918_at	6508	SLC4A3	solute carrier family 4, anion exchanger, member 3	-1.25779
209561_at	7059	THBS3	thrombospondin 3	-1.25566
219278_at	9064	MAP3K6	mitogen-activated protein kinase kinase kinase 6	-1.25532
239218_at	5137	PDE1C	phosphodiesterase 1C, calmodulin-dependent 70kDa	-1.25455
209183_s_at	11067	C10orf10	chromosome 10 open reading frame 10	-1.25381
221479_s_at	665	BNIP3L	BCL2/adenovirus E1B 19kDa interacting protein 3-like	-1.25309
242324_x_at	147372	CCBE1	collagen and calcium binding EGF domains 1	-1.25268
205346_at	6483	ST3GAL2	ST3 beta-galactoside alpha-2,3-sialyltransferase 2	-1.25264
244280_at	-	-	-	-1.2523
204854_at	10536	LEPREL2	leprecan-like 2	-1.25134
202669_s_at	1948	EFNB2	ephrin-B2	-1.25035
224710_at	83871	RAB34	RAB34, member RAS oncogene family	-1.24898
209408_at	11004	KIF2C	kinesin family member 2C	-1.24634
213175_s_at	6628	SNRPB	small nuclear ribonucleoprotein polypeptides B and B1	-1.24588
235459_at	-	-	-	-1.24573
225687_at	81610	FAM83D	family with sequence similarity 83, member D	-1.24566
221972_s_at	51150	SDF4	stromal cell derived factor 4	-1.24537
224770_s_at	89796	NAV1	neuron navigator 1	-1.24403
209177_at	25915	C3orf60	chromosome 3 open reading frame 60	-1.24338
204670_x_at	3119	HLA-DQB1	major histocompatibility complex, class II, DQ beta 1	-1.24218
204223_at	5549	PRELP	proline/arginine-rich end leucine-rich repeat protein	-1.24066
218741_at	79019	CENPM	centromere protein M	-1.24028
201910_at	10160	FARP1	FERM, RhoGEF (ARHGEF) and pleckstrin domain protein 1 (chondrocyte-derived)	-1.23757
213640_s_at	4015	LOX	lysyl oxidase	-1.2359
223307_at	83461	CDCA3	cell division cycle associated 3	-1.2351
201231_s_at	2023	ENO1	enolase 1, (alpha)	-1.23458
218574_s_at	29995	LMCD1	LIM and cysteine-rich domains 1	-1.23277
232795_at	-	-	-	-1.23169
202765_s_at	2200	FBN1	fibrillin 1	-1.23124
231098_at	-	-	-	-1.23104
205715_at	683	BST1	bone marrow stromal cell antigen 1	-1.22994
204158_s_at	10312	TCIRG1	T-cell, immune regulator 1, ATPase, H+ transporting, lysosomal V0 subunit A3	-1.22776
225860_at	729580	LOC729580	hypothetical LOC729580	-1.22614
219862_s_at	26502	NARF	nuclear prelamin A recognition factor	-1.22581
205109_s_at	50649	ARHGEF4	Rho guanine nucleotide exchange factor (GEF) 4	-1.22575
204508_s_at	771	CA12	carbonic anhydrase XII	-1.22286
205944_s_at	8218	CLTCL1	clathrin, heavy chain-like 1	-1.22236
209395_at	1116	CHI3L1	chitinase 3-like 1 (cartilage glycoprotein-39)	-1.22209
228622_s_at	3338	DNAJC4	DnaJ (Hsp40) homolog, subfamily C, member 4	-1.22159
43544_at	10025	MED16	mediator complex subunit 16	-1.221
204099_at	6604	SMARCD3	SWI/SNF related, matrix associated, actin dependent regulator of chromatin, subfamily d, member 3	-1.22056
218480_at	60509	AGBL5	ATP/GTP binding protein-like 5	-1.22023
228524_at	203054	ADCK5	aarF domain containing kinase 5	-1.22014
1568765_at	5054	SERPINE1	serpin peptidase inhibitor, clade E (nexin, plasminogen activator inhibitor type 1), member 1	-1.21918
204338_s_at	5999	RGS4	regulator of G-protein signaling 4	-1.21881
211990_at	3113	HLA-DPA1	major histocompatibility complex, class II, DP alpha 1	-1.21631
212822_at	57493	HEG1	HEG homolog 1 (zebrafish)	-1.21571
225373_at	64115	C10orf54	chromosome 10 open reading frame 54	-1.21213
202671_s_at	8566	PDXK	pyridoxal (pyridoxine, vitamin B6) kinase	-1.21031
200737_at	5230	PGK1	phosphoglycerate kinase 1	-1.21004
203516_at	6640	SNTA1	syntrophin, alpha 1 (dystrophin-associated protein A1, 59kDa, acidic component)	-1.20865
209663_s_at	3679	ITGA7	integrin, alpha 7	-1.207
211737_x_at	5764	PTN	pleiotrophin	-1.20578
200024_at	6193	RPS5	ribosomal protein S5	-1.20525
222680_s_at	51514	DTL	denticleless homolog (Drosophila)	-1.20421
205524_s_at	1404	HAPLN1	hyaluronan and proteoglycan link protein 1	-1.20006
202332_at	1454	CSNK1E	casein kinase 1, epsilon	-1.20002
207148_x_at	51778	MYOZ2	myozenin 2	-1.19947
209017_s_at	9361	LONP1	lon peptidase 1, mitochondrial	-1.19892
212022_s_at	4288	MKI67	antigen identified by monoclonal antibody Ki-67	-1.19797
222199_s_at	55909	BIN3	bridging integrator 3	-1.19782
219088_s_at	79177	ZNF576	zinc finger protein 576	-1.19729
227657_at	57484	RNF150	ring finger protein 150	-1.19612
221566_s_at	8996	NOL3	nucleolar protein 3 (apoptosis repressor with CARD domain)	-1.1954
218821_at	79716	NPEPL1	aminopeptidase-like 1	-1.19453
225720_at	171024	SYNPO2	synaptopodin 2	-1.19313
200822_x_at	7167	TPI1	triosephosphate isomerase 1	-1.19283
224807_at	57655	GRAMD1A	GRAM domain containing 1A	-1.18853
209312_x_at	3119	HLA-DQB1	major histocompatibility complex, class II, DQ beta 1	-1.18817
202471_s_at	3421	IDH3G	isocitrate dehydrogenase 3 (NAD+) gamma	-1.18711
202862_at	2184	FAH	fumarylacetoacetate hydrolase (fumarylacetoacetase)	-1.18702
1553984_s_at	1841	DTYMK	deoxythymidylate kinase (thymidylate kinase)	-1.1868
205781_at	9605	C16orf7	chromosome 16 open reading frame 7	-1.18602
205258_at	3625	INHBB	inhibin, beta B	-1.18408
218927_s_at	55501	CHST12	carbohydrate (chondroitin 4) sulfotransferase 12	-1.18361
225203_at	84988	PPP1R16A	protein phosphatase 1, regulatory (inhibitor) subunit 16A	-1.18354
226121_at	147015	DHRS13	dehydrogenase/reductase (SDR family) member 13	-1.18349
222958_s_at	55635	DEPDC1	DEP domain containing 1	-1.18274
210678_s_at	10555	AGPAT2	1-acylglycerol-3-phosphate O-acyltransferase 2 (lysophosphatidic acid acyltransferase, beta)	-1.18247
202554_s_at	2947	GSTM3	glutathione S-transferase M3 (brain)	-1.18211
224609_at	57153	SLC44A2	solute carrier family 44, member 2	-1.18149
225794_s_at	91689	C22orf32	chromosome 22 open reading frame 32	-1.18123
226434_at	221908	C7orf47	chromosome 7 open reading frame 47	-1.1811
202472_at	4351	MPI	mannose phosphate isomerase	-1.18094
204162_at	10403	NDC80	NDC80 homolog, kinetochore complex component (S. cerevisiae)	-1.18078
212026_s_at	23265	EXOC7	exocyst complex component 7	-1.17832
201961_s_at	10193	RNF41	ring finger protein 41	-1.17806
221591_s_at	54478	FAM64A	family with sequence similarity 64, member A	-1.17795
203657_s_at	8722	CTSF	cathepsin F	-1.17543
225529_at	116983	ACAP3	ArfGAP with coiled-coil, ankyrin repeat and PH domains 3	-1.17453
223206_s_at	57407	NMRAL1	NmrA-like family domain containing 1	-1.17445
208929_x_at	6137	RPL13	ribosomal protein L13	-1.17253
210330_at	6444	SGCD	sarcoglycan, delta (35kDa dystrophin-associated glycoprotein)	-1.17206
208955_at	1854	DUT	deoxyuridine triphosphatase	-1.16987
218494_s_at	56731	SLC2A4RG	SLC2A4 regulator	-1.1698
201095_at	1611	DAP	death-associated protein	-1.16975
200852_x_at	2783	GNB2	guanine nucleotide binding protein (G protein), beta polypeptide 2	-1.16929
217294_s_at	2023	ENO1	enolase 1, (alpha)	-1.16903
203281_s_at	7318	UBA7	ubiquitin-like modifier activating enzyme 7	-1.16891
219270_at	79094	CHAC1	ChaC, cation transport regulator homolog 1 (E. coli)	-1.16814
203576_at	587	BCAT2	branched chain aminotransferase 2, mitochondrial	-1.16772
202839_s_at	4713	NDUFB7	NADH dehydrogenase (ubiquinone) 1 beta subcomplex, 7, 18kDa	-1.16717
222854_s_at	54960	GEMIN8	gem (nuclear organelle) associated protein 8	-1.16711
206348_s_at	5165	PDK3	pyruvate dehydrogenase kinase, isozyme 3	-1.16492
230726_at	85302	FBF1	Fas (TNFRSF6) binding factor 1	-1.16405
209619_at	972	CD74	CD74 molecule, major histocompatibility complex, class II invariant chain	-1.16399
226325_at	122622	ADSSL1	adenylosuccinate synthase like 1	-1.16355
230565_at	127124	ATP6V1G3	ATPase, H+ transporting, lysosomal 13kDa, V1 subunit G3	-1.16334
203973_s_at	1052	CEBPD	CCAAT/enhancer binding protein (C/EBP), delta	-1.16327
209709_s_at	3161	HMMR	hyaluronan-mediated motility receptor (RHAMM)	-1.161
202799_at	8192	CLPP	ClpP caseinolytic peptidase, ATP-dependent, proteolytic subunit homolog (E. coli)	-1.16081
229641_at	-	-	-	-1.16062
1554408_a_at	7083	TK1	thymidine kinase 1, soluble	-1.15901
223193_x_at	26355	FAM162A	family with sequence similarity 162, member A	-1.15872
202528_at	2582	GALE	UDP-galactose-4-epimerase	-1.15828
211966_at	1284	COL4A2	collagen, type IV, alpha 2	-1.15645
55583_at	57572	DOCK6	dedicator of cytokinesis 6	-1.15522
211065_x_at	5211	PFKL	phosphofructokinase, liver	-1.155
221882_s_at	58986	TMEM8	transmembrane protein 8 (five membrane-spanning domains)	-1.15496
226595_at	90203	SNX21	sorting nexin family member 21	-1.15475
213897_s_at	6150	MRPL23	mitochondrial ribosomal protein L23	-1.15224
233563_s_at	54973	CPSF3L	cleavage and polyadenylation specific factor 3-like	-1.15221
208677_s_at	682	BSG	basigin (Ok blood group)	-1.15109
223207_x_at	29085	PHPT1	phosphohistidine phosphatase 1	-1.15088
202139_at	8574	AKR7A2	aldo-keto reductase family 7, member A2 (aflatoxin aldehyde reductase)	-1.15039
204415_at	2537	IFI6	interferon, alpha-inducible protein 6	-1.15031
219148_at	55872	PBK	PDZ binding kinase	-1.15024
204663_at	10873	ME3	malic enzyme 3, NADP(+)-dependent, mitochondrial	-1.14734
1598_g_at	2621	GAS6	growth arrest-specific 6	-1.14686
214724_at	85458	DIXDC1	DIX domain containing 1	-1.14499
228384_s_at	84795	C10orf33	chromosome 10 open reading frame 33	-1.14427
225241_at	151887	CCDC80	coiled-coil domain containing 80	-1.14265
214927_at	9358	ITGBL1	integrin, beta-like 1 (with EGF-like repeat domains)	-1.14233
1559221_at	-	-	-	-1.14191
233167_at	83642	RP3-402G11.5	selenoprotein O	-1.14184
223313_s_at	81557	MAGED4B	melanoma antigen family D, 4B	-1.1415
1554452_a_at	29923	HIG2	hypoxia-inducible protein 2	-1.14066
228407_at	222663	SCUBE3	signal peptide, CUB domain, EGF-like 3	-1.1402
201079_at	9144	SYNGR2	synaptogyrin 2	-1.13852
203729_at	2014	EMP3	epithelial membrane protein 3	-1.13792
201412_at	26020	LRP10	low density lipoprotein receptor-related protein 10	-1.13746
210052_s_at	22974	TPX2	TPX2, microtubule-associated, homolog (Xenopus laevis)	-1.13669
211666_x_at	6122	RPL3	ribosomal protein L3	-1.1364
209758_s_at	8076	MFAP5	microfibrillar associated protein 5	-1.13491
64486_at	57175	CORO1B	coronin, actin binding protein, 1B	-1.13365
236180_at	-	-	-	-1.13192
211026_s_at	11343	MGLL	monoglyceride lipase	-1.13025
212143_s_at	3486	IGFBP3	insulin-like growth factor binding protein 3	-1.13025
213126_at	112950	MED8	mediator complex subunit 8	-1.12966
213290_at	1292	COL6A2	collagen, type VI, alpha 2	-1.12864
217949_s_at	79001	VKORC1	vitamin K epoxide reductase complex, subunit 1	-1.12858
223842_s_at	51435	SCARA3	scavenger receptor class A, member 3	-1.12727
209156_s_at	1292	COL6A2	collagen, type VI, alpha 2	-1.12695
224715_at	89891	WDR34	WD repeat domain 34	-1.12686
203683_s_at	7423	VEGFB	vascular endothelial growth factor B	-1.1263
204088_at	5025	P2RX4	purinergic receptor P2X, ligand-gated ion channel, 4	-1.12613
206782_s_at	3338	DNAJC4	DnaJ (Hsp40) homolog, subfamily C, member 4	-1.12557
208821_at	6628	SNRPB	small nuclear ribonucleoprotein polypeptides B and B1	-1.12344
224464_s_at	84304	NUDT22	nudix (nucleoside diphosphate linked moiety X)-type motif 22	-1.12254
216326_s_at	8841	HDAC3	histone deacetylase 3	-1.12079
218086_at	56654	NPDC1	neural proliferation, differentiation and control, 1	-1.1205
216032_s_at	51614	ERGIC3	ERGIC and golgi 3	-1.11977
224794_s_at	51148	CERCAM	cerebral endothelial cell adhesion molecule	-1.1191
228360_at	130576	LYPD6B	LY6/PLAUR domain containing 6B	-1.11756
204641_at	4751	NEK2	NIMA (never in mitosis gene a)-related kinase 2	-1.11556
220994_s_at	29091	STXBP6	syntaxin binding protein 6 (amisyn)	-1.11548
217838_s_at	51466	EVL	Enah/Vasp-like	-1.11518
225080_at	4641	MYO1C	myosin IC	-1.115
212021_s_at	4288	MKI67	antigen identified by monoclonal antibody Ki-67	-1.11466
228635_at	57575	PCDH10	protocadherin 10	-1.11366
201842_s_at	2202	EFEMP1	EGF-containing fibulin-like extracellular matrix protein 1	-1.11363
201843_s_at	2202	EFEMP1	EGF-containing fibulin-like extracellular matrix protein 1	-1.11338
219373_at	54344	DPM3	dolichyl-phosphate mannosyltransferase polypeptide 3	-1.1132
208336_s_at	9524	GPSN2	glycoprotein, synaptic 2	-1.11291
218662_s_at	64151	NCAPG	non-SMC condensin I complex, subunit G	-1.112
231817_at	54532	USP53	ubiquitin specific peptidase 53	-1.11076
204345_at	1307	COL16A1	collagen, type XVI, alpha 1	-1.11074
206343_s_at	3084	NRG1	neuregulin 1	-1.11035
202012_s_at	2132	EXT2	exostoses (multiple) 2	-1.10987
206580_s_at	30008	EFEMP2	EGF-containing fibulin-like extracellular matrix protein 2	-1.10916
203213_at	983	CDC2	cell division cycle 2, G1 to S and G2 to M	-1.10845
216570_x_at	6159	RPL29	ribosomal protein L29	-1.10825
219047_s_at	79759	ZNF668	zinc finger protein 668	-1.10717
220091_at	11182	SLC2A6	solute carrier family 2 (facilitated glucose transporter), member 6	-1.10692
206290_s_at	6000	RGS7	regulator of G-protein signaling 7	-1.10658
1555724_s_at	6876	TAGLN	transgelin	-1.1061
202555_s_at	4638	MYLK	myosin light chain kinase	-1.10601
212955_s_at	5438	POLR2I	polymerase (RNA) II (DNA directed) polypeptide I, 14.5kDa	-1.10596
204916_at	10267	RAMP1	receptor (G protein-coupled) activity modifying protein 1	-1.10593
202943_s_at	4668	NAGA	N-acetylgalactosaminidase, alpha-	-1.10589
213969_x_at	6159	RPL29	ribosomal protein L29	-1.10499
204958_at	1263	PLK3	polo-like kinase 3 (Drosophila)	-1.10406
201364_s_at	4947	OAZ2	ornithine decarboxylase antizyme 2	-1.10197
36545_s_at	9814	SFI1	Sfi1 homolog, spindle assembly associated (yeast)	-1.10197
201291_s_at	7153	TOP2A	topoisomerase (DNA) II alpha 170kDa	-1.10192
202009_at	11344	TWF2	twinfilin, actin-binding protein, homolog 2 (Drosophila)	-1.10063
218849_s_at	10848	PPP1R13L	protein phosphatase 1, regulatory (inhibitor) subunit 13 like	-1.10058
232965_at	400684	LOC400684	hypothetical gene supported by BC000922	-1.0993
224577_at	57222	ERGIC1	endoplasmic reticulum-golgi intermediate compartment (ERGIC) 1	-1.09901
213693_s_at	4582	MUC1	mucin 1, cell surface associated	-1.09892
201903_at	7384	UQCRC1	ubiquinol-cytochrome c reductase core protein I	-1.09862
202094_at	332	BIRC5	baculoviral IAP repeat-containing 5	-1.09832
213007_at	55215	FANCI	Fanconi anemia, complementation group I	-1.09728
225245_x_at	55766	H2AFJ	H2A histone family, member J	-1.09721
225025_at	93185	IGSF8	immunoglobulin superfamily, member 8	-1.09699
1553715_s_at	84331	C16orf14	chromosome 16 open reading frame 14	-1.09659
221545_x_at	10025	MED16	mediator complex subunit 16	-1.09596
204034_at	23474	ETHE1	ethylmalonic encephalopathy 1	-1.09407
216840_s_at	3908	LAMA2	laminin, alpha 2	-1.09404
210276_s_at	11078	TRIOBP	TRIO and F-actin binding protein	-1.09394
212347_x_at	10608	MXD4	MAX dimerization protein 4	-1.09365
209820_s_at	10607	TBL3	transducin (beta)-like 3	-1.09271
201280_s_at	1601	DAB2	disabled homolog 2, mitogen-responsive phosphoprotein (Drosophila)	-1.09106
227061_at	-	-	-	-1.09025
226727_at	284106	CISD3	CDGSH iron sulfur domain 3	-1.09006
214890_s_at	25854	FAM149A	family with sequence similarity 149, member A	-1.08955
213764_s_at	8076	MFAP5	microfibrillar associated protein 5	-1.08939
202148_s_at	5831	PYCR1	pyrroline-5-carboxylate reductase 1	-1.08933
209610_s_at	6509	SLC1A4	solute carrier family 1 (glutamate/neutral amino acid transporter), member 4	-1.08834
205141_at	283	ANG	angiogenin, ribonuclease, RNase A family, 5	-1.08822
201770_at	6626	SNRPA	small nuclear ribonucleoprotein polypeptide A	-1.08802
1556017_at	23218	NBEAL2	neurobeachin-like 2	-1.08705
209807_s_at	4784	NFIX	nuclear factor I/X (CCAAT-binding transcription factor)	-1.08692
203418_at	890	CCNA2	cyclin A2	-1.08667
208850_s_at	7070	THY1	Thy-1 cell surface antigen	-1.08659
200636_s_at	5792	PTPRF	protein tyrosine phosphatase, receptor type, F	-1.08624
232946_s_at	55191	NADSYN1	NAD synthetase 1	-1.08599
227864_s_at	93343	FAM125A	family with sequence similarity 125, member A	-1.08586
204559_s_at	51690	LSM7	LSM7 homolog, U6 small nuclear RNA associated (S. cerevisiae)	-1.08582
201858_s_at	5552	SRGN	serglycin	-1.08481
212776_s_at	23363	OBSL1	obscurin-like 1	-1.08448
217977_at	51734	SEPX1	selenoprotein X, 1	-1.08405
214910_s_at	55937	APOM	apolipoprotein M	-1.083
227966_s_at	90557	CCDC74A	coiled-coil domain containing 74A	-1.08286
227903_x_at	91978	C19orf20	chromosome 19 open reading frame 20	-1.08275
204822_at	7272	TTK	TTK protein kinase	-1.08232
218706_s_at	65983	GRAMD3	GRAM domain containing 3	-1.08167
223234_at	10459	MAD2L2	MAD2 mitotic arrest deficient-like 2 (yeast)	-1.08108
207265_s_at	11015	KDELR3	KDEL (Lys-Asp-Glu-Leu) endoplasmic reticulum protein retention receptor 3	-1.08013
202016_at	4232	MEST	mesoderm specific transcript homolog (mouse)	-1.08012
243864_at	151887	CCDC80	coiled-coil domain containing 80	-1.07984
228261_at	142678	MIB2	mindbomb homolog 2 (Drosophila)	-1.07845
201369_s_at	678	ZFP36L2	zinc finger protein 36, C3H type-like 2	-1.07836
218215_s_at	7376	NR1H2	nuclear receptor subfamily 1, group H, member 2	-1.07817
241966_at	4644	MYO5A	myosin VA (heavy chain 12, myoxin)	-1.07693
204922_at	79703	C11orf80	chromosome 11 open reading frame 80	-1.07688
209432_s_at	10488	CREB3	cAMP responsive element binding protein 3	-1.07576
210298_x_at	2273	FHL1	four and a half LIM domains 1	-1.07546
218995_s_at	1906	EDN1	endothelin 1	-1.07397
225173_at	93663	ARHGAP18	Rho GTPase activating protein 18	-1.07335
208887_at	8666	EIF3G	eukaryotic translation initiation factor 3, subunit G	-1.07297
242460_at	-	-	-	-1.07219
210078_s_at	7881	KCNAB1	potassium voltage-gated channel, shaker-related subfamily, beta member 1	-1.07129
222454_s_at	55742	PARVA	parvin, alpha	-1.07036
225298_at	25953	PNKD	paroxysmal nonkinesigenic dyskinesia	-1.07006
213438_at	23114	NFASC	neurofascin homolog (chicken)	-1.0694
203228_at	5050	PAFAH1B3	platelet-activating factor acetylhydrolase, isoform Ib, gamma subunit 29kDa	-1.0683
210778_s_at	10608	MXD4	MAX dimerization protein 4	-1.06731
221666_s_at	29108	PYCARD	PYD and CARD domain containing	-1.06688
231059_x_at	51282	SCAND1	SCAN domain containing 1	-1.06619
200075_s_at	2987	GUK1	guanylate kinase 1	-1.06612
227764_at	130574	LYPD6	LY6/PLAUR domain containing 6	-1.06574
220973_s_at	81858	SHARPIN	SHANK-associated RH domain interactor	-1.06454
209420_s_at	6609	SMPD1	sphingomyelin phosphodiesterase 1, acid lysosomal	-1.06368
213067_at	4628	MYH10	myosin, heavy chain 10, non-muscle	-1.06328
209837_at	9179	AP4M1	adaptor-related protein complex 4, mu 1 subunit	-1.06269
219219_at	54958	TMEM160	transmembrane protein 160	-1.0599
217747_s_at	6203	RPS9	ribosomal protein S9	-1.05967
227951_s_at	147965	FAM98C	family with sequence similarity 98, member C	-1.05816
217356_s_at	5230	PGK1	phosphoglycerate kinase 1	-1.05744
223229_at	29089	UBE2T	ubiquitin-conjugating enzyme E2T (putative)	-1.05701
214889_at	25854	FAM149A	family with sequence similarity 149, member A	-1.05673
210735_s_at	771	CA12	carbonic anhydrase XII	-1.05622
214297_at	1464	CSPG4	chondroitin sulfate proteoglycan 4	-1.05499
221521_s_at	51659	GINS2	GINS complex subunit 2 (Psf2 homolog)	-1.05448
208308_s_at	2821	GPI	glucose phosphate isomerase	-1.0538
209587_at	5307	PITX1	paired-like homeodomain 1	-1.05285
218755_at	10112	KIF20A	kinesin family member 20A	-1.05222
214104_at	23432	GPR161	G protein-coupled receptor 161	-1.05145
202996_at	57804	POLD4	polymerase (DNA-directed), delta 4	-1.05139
228114_x_at	84326	C16orf13	chromosome 16 open reading frame 13	-1.05122
216927_at	23383	KIAA0892	KIAA0892	-1.05037
213816_s_at	4233	MET	met proto-oncogene (hepatocyte growth factor receptor)	-1.04958
201037_at	5214	PFKP	phosphofructokinase, platelet	-1.04879
201389_at	3678	ITGA5	integrin, alpha 5 (fibronectin receptor, alpha polypeptide)	-1.04763
219165_at	64236	PDLIM2	PDZ and LIM domain 2 (mystique)	-1.0476
214752_x_at	2316	FLNA	filamin A, alpha (actin binding protein 280)	-1.04588
204298_s_at	4015	LOX	lysyl oxidase	-1.04532
209577_at	5833	PCYT2	phosphate cytidylyltransferase 2, ethanolamine	-1.04414
200835_s_at	4134	MAP4	microtubule-associated protein 4	-1.04395
244576_at	-	-	-	-1.04383
205059_s_at	3425	IDUA	iduronidase, alpha-L-	-1.04325
235318_at	2200	FBN1	fibrillin 1	-1.04287
201911_s_at	10160	FARP1	FERM, RhoGEF (ARHGEF) and pleckstrin domain protein 1 (chondrocyte-derived)	-1.04262
224771_at	89796	NAV1	neuron navigator 1	-1.04221
217994_x_at	54973	CPSF3L	cleavage and polyadenylation specific factor 3-like	-1.03998
204126_s_at	8318	CDC45L	CDC45 cell division cycle 45-like (S. cerevisiae)	-1.03847
208711_s_at	595	CCND1	cyclin D1	-1.03778
209016_s_at	3855	KRT7	keratin 7	-1.03773
232278_s_at	55635	DEPDC1	DEP domain containing 1	-1.03747
217983_s_at	8635	RNASET2	ribonuclease T2	-1.03719
205574_x_at	649	BMP1	bone morphogenetic protein 1	-1.0369
221739_at	56005	C19orf10	chromosome 19 open reading frame 10	-1.03678
221583_s_at	3778	KCNMA1	potassium large conductance calcium-activated channel, subfamily M, alpha member 1	-1.03669
202986_at	9915	ARNT2	aryl-hydrocarbon receptor nuclear translocator 2	-1.03641
230242_at	23114	NFASC	neurofascin homolog (chicken)	-1.03628
212527_at	27351	FAM152B	family with sequence similarity 152, member B	-1.0354
225867_at	114990	VASN	vasorin	-1.03501
201107_s_at	7057	THBS1	thrombospondin 1	-1.03485
203994_s_at	755	C21orf2	chromosome 21 open reading frame 2	-1.03471
235643_at	219285	SAMD9L	sterile alpha motif domain containing 9-like	-1.0343
AFFX-HUMGAPDH/M33197_M_at	2597	GAPDH	glyceraldehyde-3-phosphate dehydrogenase	-1.03396
218840_s_at	55191	NADSYN1	NAD synthetase 1	-1.03382
203571_s_at	10974	C10orf116	chromosome 10 open reading frame 116	-1.03347
218844_at	80221	ACSF2	acyl-CoA synthetase family member 2	-1.03329
202997_s_at	4017	LOXL2	lysyl oxidase-like 2	-1.03268
227039_at	11214	AKAP13	A kinase (PRKA) anchor protein 13	-1.03254
200654_at	5034	P4HB	procollagen-proline, 2-oxoglutarate 4-dioxygenase (proline 4-hydroxylase), beta polypeptide	-1.03233
203467_at	5372	PMM1	phosphomannomutase 1	-1.03223
201226_at	4714	NDUFB8	NADH dehydrogenase (ubiquinone) 1 beta subcomplex, 8, 19kDa	-1.03168
209355_s_at	8613	PPAP2B	phosphatidic acid phosphatase type 2B	-1.03123
212226_s_at	8613	PPAP2B	phosphatidic acid phosphatase type 2B	-1.03047
205560_at	5125	PCSK5	proprotein convertase subtilisin/kexin type 5	-1.03035
223743_s_at	51073	MRPL4	mitochondrial ribosomal protein L4	-1.02848
232422_at	87769	A2LD1	AIG2-like domain 1	-1.02809
219665_at	79873	NUDT18	nudix (nucleoside diphosphate linked moiety X)-type motif 18	-1.02804
223019_at	64855	FAM129B	family with sequence similarity 129, member B	-1.02767
223176_at	222658	KCTD20	potassium channel tetramerisation domain containing 20	-1.02717
217840_at	51428	DDX41	DEAD (Asp-Glu-Ala-Asp) box polypeptide 41	-1.02647
238151_at	-	-	-	-1.02588
219561_at	51226	COPZ2	coatomer protein complex, subunit zeta 2	-1.02559
221261_x_at	81557	MAGED4B	melanoma antigen family D, 4B	-1.02549
219102_at	57333	RCN3	reticulocalbin 3, EF-hand calcium binding domain	-1.02539
200656_s_at	5034	P4HB	procollagen-proline, 2-oxoglutarate 4-dioxygenase (proline 4-hydroxylase), beta polypeptide	-1.02538
236483_at	-	-	-	-1.02533
213422_s_at	54587	MXRA8	matrix-remodelling associated 8	-1.02513
213905_x_at	633	BGN	biglycan	-1.02444
218899_s_at	79870	BAALC	brain and acute leukemia, cytoplasmic	-1.02307
209555_s_at	948	CD36	CD36 molecule (thrombospondin receptor)	-1.02305
202150_s_at	4739	NEDD9	neural precursor cell expressed, developmentally down-regulated 9	-1.02288
202455_at	10014	HDAC5	histone deacetylase 5	-1.02247
209216_at	11152	WDR45	WD repeat domain 45	-1.02238
202424_at	5605	MAP2K2	mitogen-activated protein kinase kinase 2	-1.02229
223749_at	114898	C1QTNF2	C1q and tumor necrosis factor related protein 2	-1.02175
206106_at	6300	MAPK12	mitogen-activated protein kinase 12	-1.02166
227378_x_at	84326	C16orf13	chromosome 16 open reading frame 13	-1.02156
210183_x_at	5411	PNN	pinin, desmosome associated protein	-1.02093
220744_s_at	55764	IFT122	intraflagellar transport 122 homolog (Chlamydomonas)	-1.02055
226453_at	84153	RNASEH2C	ribonuclease H2, subunit C	-1.02015
218717_s_at	55214	LEPREL1	leprecan-like 1	-1.01978
213634_s_at	55687	TRMU	tRNA 5-methylaminomethyl-2-thiouridylate methyltransferase	-1.01977
222942_s_at	26230	TIAM2	T-cell lymphoma invasion and metastasis 2	-1.01944
219408_at	54496	PRMT7	protein arginine methyltransferase 7	-1.0189
1564494_s_at	5034	P4HB	procollagen-proline, 2-oxoglutarate 4-dioxygenase (proline 4-hydroxylase), beta polypeptide	-1.01866
208270_s_at	6051	RNPEP	arginyl aminopeptidase (aminopeptidase B)	-1.01857
1569999_at	-	-	-	-1.01851
1568623_a_at	339665	SLC35E4	solute carrier family 35, member E4	-1.01836
203031_s_at	7390	UROS	uroporphyrinogen III synthase	-1.01805
203469_s_at	8558	CDK10	cyclin-dependent kinase 10	-1.01728
1555630_a_at	83871	RAB34	RAB34, member RAS oncogene family	-1.01652
215280_s_at	8541	PPFIA3	protein tyrosine phosphatase, receptor type, f polypeptide (PTPRF), interacting protein (liprin), alpha 3	-1.01566
216975_x_at	4861	NPAS1	neuronal PAS domain protein 1	-1.01529
222191_s_at	11285	B4GALT7	xylosylprotein beta 1,4-galactosyltransferase, polypeptide 7 (galactosyltransferase I)	-1.01491
218961_s_at	11284	PNKP	polynucleotide kinase 3'-phosphatase	-1.01476
200974_at	59	ACTA2	actin, alpha 2, smooth muscle, aorta	-1.0136
212995_x_at	80097	FAM128B	family with sequence similarity 128, member B	-1.01295
212492_s_at	23030	JMJD2B	jumonji domain containing 2B	-1.01204
210983_s_at	4176	MCM7	minichromosome maintenance complex component 7	-1.01189
222686_s_at	55313	FLJ11151	hypothetical protein FLJ11151	-1.01078
223312_at	84279	C2orf7	chromosome 2 open reading frame 7	-1.01047
218148_at	80152	CENPT	centromere protein T	-1.01046
210561_s_at	26118	WSB1	WD repeat and SOCS box-containing 1	-1.0099
203235_at	7064	THOP1	thimet oligopeptidase 1	-1.00903
61734_at	57333	RCN3	reticulocalbin 3, EF-hand calcium binding domain	-1.00867
202098_s_at	3275	PRMT2	protein arginine methyltransferase 2	-1.00796
1557286_at	-	-	-	-1.00748
202758_s_at	8625	RFXANK	regulatory factor X-associated ankyrin-containing protein	-1.00747
226869_at	1953	MEGF6	multiple EGF-like-domains 6	-1.0074
205669_at	4685	NCAM2	neural cell adhesion molecule 2	-1.00709
223436_s_at	83707	TRPT1	tRNA phosphotransferase 1	-1.00679
202273_at	5159	PDGFRB	platelet-derived growth factor receptor, beta polypeptide	-1.0065
227096_at	126119	JOSD2	Josephin domain containing 2	-1.00551
228632_at	-	-	-	-1.00533
210075_at	51257	MARCH2	membrane-associated ring finger (C3HC4) 2	-1.00509
218039_at	51203	NUSAP1	nucleolar and spindle associated protein 1	-1.00452
205679_x_at	176	ACAN	aggrecan	-1.00448
212212_s_at	26173	INTS1	integrator complex subunit 1	-1.00412
232480_at	400931	FLJ27365	FLJ27365 protein	-1.00399
219637_at	80210	ARMC9	armadillo repeat containing 9	-1.0037
201314_at	10494	STK25	serine/threonine kinase 25 (STE20 homolog, yeast)	-1.00328
213892_s_at	353	APRT	adenine phosphoribosyltransferase	-1.00277
210106_at	5959	RDH5	retinol dehydrogenase 5 (11-cis/9-cis)	-1.00207
207692_s_at	176	ACAN	aggrecan	-1.00198
223072_s_at	23559	WBP1	WW domain binding protein 1	-1.00167
220734_s_at	80772	GLTPD1	glycolipid transfer protein domain containing 1	-1.00129
204962_s_at	1058	CENPA	centromere protein A	-1.0008
List of genes induced by SYT-SSX1 expression in human MSCs batch 2
probeset	entrez	gene_symbol	description	M
211597_s_at	84525	HOPX	HOP homeobox	6.11156
209570_s_at	27065	D4S234E	DNA segment on chromosome 4 (unique) 234 expressed sequence	4.55265
223869_at	50964	SOST	sclerosteosis	4.2986
209047_at	358	AQP1	aquaporin 1 (Colton blood group)	4.1931
209569_x_at	27065	D4S234E	DNA segment on chromosome 4 (unique) 234 expressed sequence	3.97239
202409_at	3481	IGF2	insulin-like growth factor 2 (somatomedin A)	3.89345
213479_at	4885	NPTX2	neuronal pentraxin II	3.77339
204379_s_at	2261	FGFR3	fibroblast growth factor receptor 3	3.57655
209560_s_at	8788	DLK1	delta-like 1 homolog (Drosophila)	3.48688
204584_at	3897	L1CAM	L1 cell adhesion molecule	3.41169
212187_x_at	5730	PTGDS	prostaglandin D2 synthase 21kDa (brain)	3.17649
218723_s_at	28984	C13orf15	chromosome 13 open reading frame 15	3.15067
204724_s_at	1299	COL9A3	collagen, type IX, alpha 3	3.14678
211663_x_at	5730	PTGDS	prostaglandin D2 synthase 21kDa (brain)	3.11151
211748_x_at	5730	PTGDS	prostaglandin D2 synthase 21kDa (brain)	3.04788
230104_s_at	11076	TPPP	tubulin polymerization promoting protein	2.9901
205975_s_at	3231	HOXD1	homeobox D1	2.92536
214023_x_at	347733	TUBB2B	tubulin, beta 2B	2.85937
209170_s_at	2824	GPM6B	glycoprotein M6B	2.83175
219895_at	55026	FAM70A	family with sequence similarity 70, member A	2.71561
226828_s_at	26508	HEYL	hairy/enhancer-of-split related with YRPW motif-like	2.69851
219181_at	9388	LIPG	lipase, endothelial	2.67526
204465_s_at	9118	INA	internexin neuronal intermediate filament protein, alpha	2.66036
227297_at	3680	ITGA9	integrin, alpha 9	2.65482
207542_s_at	358	AQP1	aquaporin 1 (Colton blood group)	2.57942
206633_at	1134	CHRNA1	cholinergic receptor, nicotinic, alpha 1 (muscle)	2.54415
201721_s_at	7805	LAPTM5	lysosomal multispanning membrane protein 5	2.48389
209167_at	2824	GPM6B	glycoprotein M6B	2.44208
217028_at	7852	CXCR4	chemokine (C-X-C motif) receptor 4	2.42223
213348_at	1028	CDKN1C	cyclin-dependent kinase inhibitor 1C (p57, Kip2)	2.40796
39248_at	360	AQP3	aquaporin 3 (Gill blood group)	2.37512
228904_at	3213	HOXB3	homeobox B3	2.35147
1552767_a_at	90161	HS6ST2	heparan sulfate 6-O-sulfotransferase 2	2.34592
224724_at	55959	SULF2	sulfatase 2	2.33782
225016_at	147495	APCDD1	adenomatosis polyposis coli down-regulated 1	2.25816
202274_at	72	ACTG2	actin, gamma 2, smooth muscle, enteric	2.25689
243173_at	164633	CABP7	calcium binding protein 7	2.2272
218638_s_at	10417	SPON2	spondin 2, extracellular matrix protein	2.21303
233555_s_at	55959	SULF2	sulfatase 2	2.21177
230406_at	-	-	-	2.20334
209990_s_at	9568	GABBR2	gamma-aminobutyric acid (GABA) B receptor, 2	2.20325
224646_x_at	283120	H19	H19, imprinted maternally expressed transcript (non-protein coding)	2.15333
203477_at	1306	COL15A1	collagen, type XV, alpha 1	2.13432
213880_at	8549	LGR5	leucine-rich repeat-containing G protein-coupled receptor 5	2.1145
229242_at	-	-	-	2.10177
204712_at	11197	WIF1	WNT inhibitory factor 1	2.09198
203382_s_at	348	APOE	apolipoprotein E	2.08995
215783_s_at	249	ALPL	alkaline phosphatase, liver/bone/kidney	2.08154
215008_at	7093	TLL2	tolloid-like 2	2.07597
214414_x_at	3039	HBA1	hemoglobin, alpha 1	2.00614
226811_at	54855	FAM46C	family with sequence similarity 46, member C	1.98168
214240_at	51083	GAL	galanin prepropeptide	1.96218
242931_at	79836	LONRF3	LON peptidase N-terminal domain and ring finger 3	1.91093
223168_at	58480	RHOU	ras homolog gene family, member U	1.88575
206140_at	9355	LHX2	LIM homeobox 2	1.87937
207426_s_at	7292	TNFSF4	tumor necrosis factor (ligand) superfamily, member 4	1.83328
227480_at	56241	SUSD2	sushi domain containing 2	1.83107
202421_at	3321	IGSF3	immunoglobulin superfamily, member 3	1.82146
228885_at	256691	MAMDC2	MAM domain containing 2	1.81607
202508_s_at	6616	SNAP25	synaptosomal-associated protein, 25kDa	1.81218
240633_at	285489	DOK7	docking protein 7	1.78216
229125_at	163782	KANK4	KN motif and ankyrin repeat domains 4	1.76982
232397_at	-	-	-	1.76769
235210_s_at	157869	RPESP	RPE-spondin	1.76257
204803_s_at	6236	RRAD	Ras-related associated with diabetes	1.7536
202410_x_at	3481	IGF2	insulin-like growth factor 2 (somatomedin A)	1.75145
205157_s_at	3872	KRT17	keratin 17	1.74751
203917_at	1525	CXADR	coxsackie virus and adenovirus receptor	1.73561
225817_at	84952	CGNL1	cingulin-like 1	1.7345
223278_at	2706	GJB2	gap junction protein, beta 2, 26kDa	1.72309
232165_at	83481	EPPK1	epiplakin 1	1.70864
1558404_at	644242	LOC644242	hypothetical protein LOC644242	1.69502
219612_s_at	2266	FGG	fibrinogen gamma chain	1.67081
200884_at	1152	CKB	creatine kinase, brain	1.65216
221204_s_at	55118	CRTAC1	cartilage acidic protein 1	1.65182
227307_at	90139	TSPAN18	tetraspanin 18	1.64575
203698_s_at	2487	FRZB	frizzled-related protein	1.64413
200951_s_at	894	CCND2	cyclin D2	1.64146
209596_at	25878	MXRA5	matrix-remodelling associated 5	1.62052
203381_s_at	348	APOE	apolipoprotein E	1.6197
226497_s_at	-	-	-	1.61616
209496_at	5919	RARRES2	retinoic acid receptor responder (tazarotene induced) 2	1.58783
203394_s_at	3280	HES1	hairy and enhancer of split 1, (Drosophila)	1.57833
203395_s_at	3280	HES1	hairy and enhancer of split 1, (Drosophila)	1.57572
227550_at	143381	LOC143381	hypothetical protein LOC143381	1.57516
229479_at	-	-	-	1.55868
232164_s_at	83481	EPPK1	epiplakin 1	1.55841
230660_at	56256	SERTAD4	SERTA domain containing 4	1.55684
212236_x_at	3872	KRT17	keratin 17	1.54102
231738_at	56129	PCDHB7	protocadherin beta 7	1.52603
209459_s_at	18	ABAT	4-aminobutyrate aminotransferase	1.52245
211518_s_at	652	BMP4	bone morphogenetic protein 4	1.50764
1552701_a_at	114769	CARD16	caspase recruitment domain family, member 16	1.50626
213241_at	10154	PLXNC1	plexin C1	1.48908
202575_at	1382	CRABP2	cellular retinoic acid binding protein 2	1.47929
221558_s_at	51176	LEF1	lymphoid enhancer-binding factor 1	1.47062
225123_at	-	-	-	1.45221
231174_s_at	-	-	-	1.43911
205081_at	1396	CRIP1	cysteine-rich protein 1 (intestinal)	1.43711
228523_at	340719	NANOS1	nanos homolog 1 (Drosophila)	1.43394
205453_at	3212	HOXB2	homeobox B2	1.42786
211796_s_at	28639	TRBC1	T cell receptor beta constant 1	1.42324
209911_x_at	3017	HIST1H2BD	histone cluster 1, H2bd	1.42164
228988_at	7552	ZNF711	zinc finger protein 711	1.42059
228762_at	3955	LFNG	LFNG O-fucosylpeptide 3-beta-N-acetylglucosaminyltransferase	1.41534
202037_s_at	6422	SFRP1	secreted frizzled-related protein 1	1.40997
209343_at	80303	EFHD1	EF-hand domain family, member D1	1.40574
219093_at	55022	PID1	phosphotyrosine interaction domain containing 1	1.39736
223467_at	51655	RASD1	RAS, dexamethasone-induced 1	1.39574
203685_at	596	BCL2	B-cell CLL/lymphoma 2	1.39443
227911_at	79822	ARHGAP28	Rho GTPase activating protein 28	1.38913
219304_s_at	80310	PDGFD	platelet derived growth factor D	1.38364
204897_at	5734	PTGER4	prostaglandin E receptor 4 (subtype EP4)	1.37446
203813_s_at	6586	SLIT3	slit homolog 3 (Drosophila)	1.36763
213533_at	27065	D4S234E	DNA segment on chromosome 4 (unique) 234 expressed sequence	1.35481
226498_at	-	-	-	1.34737
228501_at	117248	GALNTL2	UDP-N-acetyl-alpha-D-galactosamine:polypeptide N-acetylgalactosaminyltransferase-like 2	1.34329
204802_at	6236	RRAD	Ras-related associated with diabetes	1.32721
226612_at	134111	FLJ25076	similar to CG4502-PA	1.32706
208792_s_at	1191	CLU	clusterin	1.31707
203638_s_at	2263	FGFR2	fibroblast growth factor receptor 2	1.31571
223822_at	55061	SUSD4	sushi domain containing 4	1.31263
225056_at	57568	SIPA1L2	signal-induced proliferation-associated 1 like 2	1.30174
213201_s_at	7138	TNNT1	troponin T type 1 (skeletal, slow)	1.30065
204984_at	2239	GPC4	glypican 4	1.29731
214079_at	10202	DHRS2	dehydrogenase/reductase (SDR family) member 2	1.2973
209791_at	11240	PADI2	peptidyl arginine deiminase, type II	1.29301
32137_at	3714	JAG2	jagged 2	1.29189
219694_at	54491	FAM105A	family with sequence similarity 105, member A	1.28606
205691_at	9143	SYNGR3	synaptogyrin 3	1.28209
204484_at	5287	PIK3C2B	phosphoinositide-3-kinase, class 2, beta polypeptide	1.28185
222484_s_at	9547	CXCL14	chemokine (C-X-C motif) ligand 14	1.28135
229127_at	58494	JAM2	junctional adhesion molecule 2	1.27928
228771_at	157	ADRBK2	adrenergic, beta, receptor kinase 2	1.27874
213661_at	25891	DKFZP586H2123	regeneration associated muscle protease	1.27597
215843_s_at	7093	TLL2	tolloid-like 2	1.27522
225491_at	6506	SLC1A2	solute carrier family 1 (glial high affinity glutamate transporter), member 2	1.27073
235944_at	83872	HMCN1	hemicentin 1	1.26998
1555989_at	-	-	-	1.26356
209460_at	18	ABAT	4-aminobutyrate aminotransferase	1.26231
231183_s_at	182	JAG1	jagged 1 (Alagille syndrome)	1.26176
223316_at	83643	CCDC3	coiled-coil domain containing 3	1.25955
208579_x_at	54145	H2BFS	H2B histone family, member S	1.25932
230319_at	-	-	-	1.24348
209351_at	3861	KRT14	keratin 14	1.24002
239481_at	286499	FAM133A	family with sequence similarity 133, member A	1.23331
239587_at	-	-	-	1.23135
230763_at	128153	SPATA17	spermatogenesis associated 17	1.22745
222043_at	1191	CLU	clusterin	1.22732
223435_s_at	9752	PCDHA9	protocadherin alpha 9	1.22316
217767_at	718	C3	complement component 3	1.22271
1552703_s_at	834	CASP1	caspase 1, apoptosis-related cysteine peptidase (interleukin 1, beta, convertase)	1.21689
208791_at	1191	CLU	clusterin	1.21665
222696_at	8313	AXIN2	axin 2	1.21182
204412_s_at	4744	NEFH	neurofilament, heavy polypeptide	1.21157
33767_at	4744	NEFH	neurofilament, heavy polypeptide	1.2104
212884_x_at	348	APOE	apolipoprotein E	1.19873
205475_at	11341	SCRG1	scrapie responsive protein 1	1.19701
206737_at	7481	WNT11	wingless-type MMTV integration site family, member 11	1.19495
208527_x_at	8339	HIST1H2BG	histone cluster 1, H2bg	1.19413
209970_x_at	834	CASP1	caspase 1, apoptosis-related cysteine peptidase (interleukin 1, beta, convertase)	1.19024
201720_s_at	7805	LAPTM5	lysosomal multispanning membrane protein 5	1.18725
242517_at	84634	KISS1R	KISS1 receptor	1.18645
206924_at	3589	IL11	interleukin 11	1.18565
219305_x_at	26232	FBXO2	F-box protein 2	1.18475
205493_s_at	10570	DPYSL4	dihydropyrimidinase-like 4	1.18455
230030_at	90161	HS6ST2	heparan sulfate 6-O-sulfotransferase 2	1.18114
235209_at	157869	RPESP	RPE-spondin	1.1737
203697_at	2487	FRZB	frizzled-related protein	1.17353
203217_s_at	8869	ST3GAL5	ST3 beta-galactoside alpha-2,3-sialyltransferase 5	1.17242
235683_at	143686	SESN3	sestrin 3	1.16636
236304_at	-	-	-	1.16517
209242_at	5178	PEG3	paternally expressed 3	1.16071
226930_at	84624	FNDC1	fibronectin type III domain containing 1	1.15626
235337_at	-	-	-	1.15491
223322_at	83593	RASSF5	Ras association (RalGDS/AF-6) domain family member 5	1.15468
238733_at	-	-	-	1.15455
227347_x_at	57801	HES4	hairy and enhancer of split 4 (Drosophila)	1.15353
229057_at	6326	SCN2A	sodium channel, voltage-gated, type II, alpha subunit	1.15264
206801_at	4879	NPPB	natriuretic peptide precursor B	1.15108
218976_at	56521	DNAJC12	DnaJ (Hsp40) homolog, subfamily C, member 12	1.15073
229580_at	-	-	-	1.15012
223854_at	56126	PCDHB10	protocadherin beta 10	1.14284
227721_at	27151	CPAMD8	C3 and PZP-like, alpha-2-macroglobulin domain containing 8	1.14122
218559_s_at	9935	MAFB	v-maf musculoaponeurotic fibrosarcoma oncogene homolog B (avian)	1.14045
204154_at	1036	CDO1	cysteine dioxygenase, type I	1.12331
235355_at	-	-	-	1.1219
214180_at	57134	MAN1C1	mannosidase, alpha, class 1C, member 1	1.11956
235687_at	199777	ZNF626	zinc finger protein 626	1.11592
203407_at	5493	PPL	periplakin	1.11498
228010_at	5522	PPP2R2C	protein phosphatase 2 (formerly 2A), regulatory subunit B, gamma isoform	1.11195
211062_s_at	8532	CPZ	carboxypeptidase Z	1.11077
227819_at	59352	LGR6	leucine-rich repeat-containing G protein-coupled receptor 6	1.11013
231131_at	286499	FAM133A	family with sequence similarity 133, member A	1.1074
210881_s_at	3481	IGF2	insulin-like growth factor 2 (somatomedin A)	1.1016
207469_s_at	8544	PIR	pirin (iron-binding nuclear protein)	1.10141
227641_at	146330	FBXL16	F-box and leucine-rich repeat protein 16	1.0964
243087_at	126820	WDR63	WD repeat domain 63	1.09206
213496_at	9890	LPPR4	plasticity related gene 1	1.09186
204471_at	2596	GAP43	growth associated protein 43	1.07925
225342_at	205	AK3L1	adenylate kinase 3-like 1	1.07917
229095_s_at	440895	LOC440895	LIM and senescent cell antigen-like domains 3-like	1.07743
227997_at	54756	IL17RD	interleukin 17 receptor D	1.07615
233512_at	-	-	-	1.07022
207076_s_at	445	ASS1	argininosuccinate synthetase 1	1.06944
223484_at	84419	C15orf48	chromosome 15 open reading frame 48	1.06352
202524_s_at	9806	SPOCK2	sparc/osteonectin, cwcv and kazal-like domains proteoglycan (testican) 2	1.06347
229674_at	56256	SERTAD4	SERTA domain containing 4	1.06269
239443_at	56130	PCDHB6	protocadherin beta 6	1.05764
225571_at	3977	LIFR	leukemia inhibitory factor receptor alpha	1.05473
235146_at	-	-	-	1.05006
205569_at	27074	LAMP3	lysosomal-associated membrane protein 3	1.04875
222379_at	23704	KCNE4	potassium voltage-gated channel, Isk-related family, member 4	1.04626
230333_at	-	-	-	1.04484
222240_s_at	51477	ISYNA1	inositol-3-phosphate synthase 1	1.04341
226913_s_at	30812	SOX8	SRY (sex determining region Y)-box 8	1.03386
206557_at	79986	ZNF702P	zinc finger protein 702 pseudogene	1.03222
223500_at	10815	CPLX1	complexin 1	1.03219
222450_at	56937	PMEPA1	prostate transmembrane protein, androgen induced 1	1.03055
205593_s_at	5152	PDE9A	phosphodiesterase 9A	1.03053
230418_s_at	57452	GALNTL1	UDP-N-acetyl-alpha-D-galactosamine:polypeptide N-acetylgalactosaminyltransferase-like 1	1.02771
219440_at	10742	RAI2	retinoic acid induced 2	1.02518
238681_at	284161	GDPD1	glycerophosphodiester phosphodiesterase domain containing 1	1.02425
220072_at	79848	CSPP1	centrosome and spindle pole associated protein 1	1.02266
204971_at	1475	CSTA	cystatin A (stefin A)	1.0197
220968_s_at	10867	TSPAN9	tetraspanin 9	1.01962
226613_at	83874	TBC1D10A	TBC1 domain family, member 10A	1.01858
204730_at	9783	RIMS3	regulating synaptic membrane exocytosis 3	1.01338
235456_at	-	-	-	1.00866
222921_s_at	23493	HEY2	hairy/enhancer-of-split related with YRPW motif 2	1.0076
209917_s_at	11257	TP53TG1	TP53 target 1 (non-protein coding)	1.0072
219529_at	9022	CLIC3	chloride intracellular channel 3	1.00645
230229_at	1739	DLG1	discs, large homolog 1 (Drosophila)	1.00534
List of genes repressed by SYT-SSX1 expression in human MSCs batch 2
probeset	entrez	gene_symbol	description	M
227265_at	10875	FGL2	fibrinogen-like 2	-3.05008
204641_at	4751	NEK2	NIMA (never in mitosis gene a)-related kinase 2	-2.85199
227475_at	94234	FOXQ1	forkhead box Q1	-2.67121
209754_s_at	7112	TMPO	thymopoietin	-2.53045
203887_s_at	7056	THBD	thrombomodulin	-2.4362
219918_s_at	259266	ASPM	asp (abnormal spindle) homolog, microcephaly associated (Drosophila)	-2.4346
232278_s_at	55635	DEPDC1	DEP domain containing 1	-2.31786
209301_at	760	CA2	carbonic anhydrase II	-2.28866
209642_at	699	BUB1	BUB1 budding uninhibited by benzimidazoles 1 homolog (yeast)	-2.28274
236641_at	9928	KIF14	kinesin family member 14	-2.26556
202580_x_at	2305	FOXM1	forkhead box M1	-2.26067
209709_s_at	3161	HMMR	hyaluronan-mediated motility receptor (RHAMM)	-2.25735
1552619_a_at	54443	ANLN	anillin, actin binding protein	-2.24575
202095_s_at	332	BIRC5	baculoviral IAP repeat-containing 5	-2.20732
201291_s_at	7153	TOP2A	topoisomerase (DNA) II alpha 170kDa	-2.18236
229437_at	114614	BIC	BIC transcript	-2.17969
204887_s_at	10733	PLK4	polo-like kinase 4 (Drosophila)	-2.16149
213599_at	11339	OIP5	Opa interacting protein 5	-2.13289
204318_s_at	51512	GTSE1	G-2 and S-phase expressed 1	-2.1132
204834_at	10875	FGL2	fibrinogen-like 2	-2.10439
219990_at	79733	E2F8	E2F transcription factor 8	-2.09286
222958_s_at	55635	DEPDC1	DEP domain containing 1	-2.08338
227971_at	203447	NRK	Nik related kinase	-2.08278
223381_at	83540	NUF2	NUF2, NDC80 kinetochore complex component, homolog (S. cerevisiae)	-2.08175
203755_at	701	BUB1B	BUB1 budding uninhibited by benzimidazoles 1 homolog beta (yeast)	-2.03989
205065_at	5167	ENPP1	ectonucleotide pyrophosphatase/phosphodiesterase 1	-2.01062
203418_at	890	CCNA2	cyclin A2	-2.00764
219502_at	55247	NEIL3	nei endonuclease VIII-like 3 (E. coli)	-2.00591
218542_at	55165	CEP55	centrosomal protein 55kDa	-2.00364
207165_at	3161	HMMR	hyaluronan-mediated motility receptor (RHAMM)	-1.98362
224428_s_at	83879	CDCA7	cell division cycle associated 7	-1.9553
204315_s_at	51512	GTSE1	G-2 and S-phase expressed 1	-1.94442
225687_at	81610	FAM83D	family with sequence similarity 83, member D	-1.9422
219148_at	55872	PBK	PDZ binding kinase	-1.93316
209891_at	57405	SPC25	SPC25, NDC80 kinetochore complex component, homolog (S. cerevisiae)	-1.93253
218755_at	10112	KIF20A	kinesin family member 20A	-1.92354
206170_at	154	ADRB2	adrenergic, beta-2-, receptor, surface	-1.91972
205167_s_at	995	CDC25C	cell division cycle 25 homolog C (S. pombe)	-1.91663
204709_s_at	9493	KIF23	kinesin family member 23	-1.91241
204962_s_at	1058	CENPA	centromere protein A	-1.91137
220651_s_at	55388	MCM10	minichromosome maintenance complex component 10	-1.90996
202870_s_at	991	CDC20	cell division cycle 20 homolog (S. cerevisiae)	-1.90888
203214_x_at	983	CDC2	cell division cycle 2, G1 to S and G2 to M	-1.90038
218663_at	64151	NCAPG	non-SMC condensin I complex, subunit G	-1.89426
219306_at	56992	KIF15	kinesin family member 15	-1.89085
1554768_a_at	4085	MAD2L1	MAD2 mitotic arrest deficient-like 1 (yeast)	-1.88112
204415_at	2537	IFI6	interferon, alpha-inducible protein 6	-1.86681
206710_s_at	23136	EPB41L3	erythrocyte membrane protein band 4.1-like 3	-1.86348
204162_at	10403	NDC80	NDC80 homolog, kinetochore complex component (S. cerevisiae)	-1.85738
206316_s_at	9735	KNTC1	kinetochore associated 1	-1.8359
210559_s_at	983	CDC2	cell division cycle 2, G1 to S and G2 to M	-1.82374
205159_at	1439	CSF2RB	colony stimulating factor 2 receptor, beta, low-affinity (granulocyte-macrophage)	-1.81663
1555758_a_at	1033	CDKN3	cyclin-dependent kinase inhibitor 3	-1.81173
235425_at	151246	SGOL2	shugoshin-like 2 (S. pombe)	-1.8114
221520_s_at	55143	CDCA8	cell division cycle associated 8	-1.80719
1554997_a_at	5743	PTGS2	prostaglandin-endoperoxide synthase 2 (prostaglandin G/H synthase and cyclooxygenase)	-1.80582
218355_at	24137	KIF4A	kinesin family member 4A	-1.79462
226980_at	55789	DEPDC1B	DEP domain containing 1B	-1.78934
1560851_at	414260	C10orf136	chromosome 10 open reading frame 136	-1.78518
204886_at	10733	PLK4	polo-like kinase 4 (Drosophila)	-1.77088
204128_s_at	5983	RFC3	replication factor C (activator 1) 3, 38kDa	-1.77083
229490_s_at	-	-	-	-1.75967
203276_at	4001	LMNB1	lamin B1	-1.75183
235545_at	55635	DEPDC1	DEP domain containing 1	-1.74776
205830_at	1047	CLGN	calmegin	-1.74419
204748_at	5743	PTGS2	prostaglandin-endoperoxide synthase 2 (prostaglandin G/H synthase and cyclooxygenase)	-1.72877
203764_at	9787	DLGAP5	discs, large (Drosophila) homolog-associated protein 5	-1.72181
219937_at	29953	TRHDE	thyrotropin-releasing hormone degrading enzyme	-1.71456
203148_s_at	9830	TRIM14	tripartite motif-containing 14	-1.71037
222608_s_at	54443	ANLN	anillin, actin binding protein	-1.70338
219493_at	79801	SHCBP1	SHC SH2-domain binding protein 1	-1.69812
218009_s_at	9055	PRC1	protein regulator of cytokinesis 1	-1.69394
208808_s_at	3148	HMGB2	high-mobility group box 2	-1.67748
232238_at	259266	ASPM	asp (abnormal spindle) homolog, microcephaly associated (Drosophila)	-1.67322
202705_at	9133	CCNB2	cyclin B2	-1.67121
204444_at	3832	KIF11	kinesin family member 11	-1.66852
223700_at	84057	MND1	meiotic nuclear divisions 1 homolog (S. cerevisiae)	-1.66849
203145_at	10615	SPAG5	sperm associated antigen 5	-1.66831
244163_at	10371	SEMA3A	sema domain, immunoglobulin domain (Ig), short basic domain, secreted, (semaphorin) 3A	-1.66824
204822_at	7272	TTK	TTK protein kinase	-1.66794
215629_s_at	8847	DLEU2	deleted in lymphocytic leukemia 2 (non-protein coding)	-1.66103
206632_s_at	9582	APOBEC3B	apolipoprotein B mRNA editing enzyme, catalytic polypeptide-like 3B	-1.65053
212022_s_at	4288	MKI67	antigen identified by monoclonal antibody Ki-67	-1.64183
209408_at	11004	KIF2C	kinesin family member 2C	-1.63665
209714_s_at	1033	CDKN3	cyclin-dependent kinase inhibitor 3	-1.63664
212021_s_at	4288	MKI67	antigen identified by monoclonal antibody Ki-67	-1.63652
202954_at	11065	UBE2C	ubiquitin-conjugating enzyme E2C	-1.62539
231855_at	57650	KIAA1524	KIAA1524	-1.62286
205113_at	4741	NEFM	neurofilament, medium polypeptide	-1.61673
209763_at	91851	CHRDL1	chordin-like 1	-1.6109
209773_s_at	6241	RRM2	ribonucleotide reductase M2 polypeptide	-1.60822
223307_at	83461	CDCA3	cell division cycle associated 3	-1.60545
218039_at	51203	NUSAP1	nucleolar and spindle associated protein 1	-1.60539
203180_at	220	ALDH1A3	aldehyde dehydrogenase 1 family, member A3	-1.59566
216870_x_at	8847	DLEU2	deleted in lymphocytic leukemia 2 (non-protein coding)	-1.59303
1555772_a_at	993	CDC25A	cell division cycle 25 homolog A (S. pombe)	-1.59154
223687_s_at	54742	LY6K	lymphocyte antigen 6 complex, locus K	-1.5825
1554408_a_at	7083	TK1	thymidine kinase 1, soluble	-1.58027
223570_at	55388	MCM10	minichromosome maintenance complex component 10	-1.566
229538_s_at	128239	IQGAP3	IQ motif containing GTPase activating protein 3	-1.56312
201292_at	7153	TOP2A	topoisomerase (DNA) II alpha 170kDa	-1.55645
212949_at	23397	NCAPH	non-SMC condensin I complex, subunit H	-1.55359
235709_at	283431	GAS2L3	growth arrest-specific 2 like 3	-1.5523
203967_at	990	CDC6	cell division cycle 6 homolog (S. cerevisiae)	-1.55206
224753_at	113130	CDCA5	cell division cycle associated 5	-1.55054
203153_at	3434	IFIT1	interferon-induced protein with tetratricopeptide repeats 1	-1.55021
228750_at	-	-	-	-1.54928
238756_at	283431	GAS2L3	growth arrest-specific 2 like 3	-1.54764
202503_s_at	9768	KIAA0101	KIAA0101	-1.54398
214022_s_at	8519	IFITM1	interferon induced transmembrane protein 1 (9-27)	-1.5372
210310_s_at	2250	FGF5	fibroblast growth factor 5	-1.5285
203888_at	7056	THBD	thrombomodulin	-1.52693
205046_at	1062	CENPE	centromere protein E, 312kDa	-1.52644
228323_at	57082	CASC5	cancer susceptibility candidate 5	-1.52097
228729_at	891	CCNB1	cyclin B1	-1.52057
218726_at	55355	HJURP	Holliday junction recognition protein	-1.51758
203213_at	983	CDC2	cell division cycle 2, G1 to S and G2 to M	-1.51623
209672_s_at	54468	FLJ20323	hypothetical protein FLJ20323	-1.51529
203968_s_at	990	CDC6	cell division cycle 6 homolog (S. cerevisiae)	-1.51134
227350_at	3070	HELLS	helicase, lymphoid-specific	-1.50882
210983_s_at	4176	MCM7	minichromosome maintenance complex component 7	-1.50627
1554696_s_at	7298	TYMS	thymidylate synthetase	-1.50127
224480_s_at	84803	AGPAT9	1-acylglycerol-3-phosphate O-acyltransferase 9	-1.50014
219510_at	10721	POLQ	polymerase (DNA directed), theta	-1.49652
204475_at	4312	MMP1	matrix metallopeptidase 1 (interstitial collagenase)	-1.49512
228281_at	220042	C11orf82	chromosome 11 open reading frame 82	-1.48901
204033_at	9319	TRIP13	thyroid hormone receptor interactor 13	-1.48895
229305_at	79682	MLF1IP	MLF1 interacting protein	-1.48304
202086_at	4599	MX1	myxovirus (influenza virus) resistance 1, interferon-inducible protein p78 (mouse)	-1.47625
219588_s_at	54892	NCAPG2	non-SMC condensin II complex, subunit G2	-1.47493
207828_s_at	1063	CENPF	centromere protein F, 350/400ka (mitosin)	-1.46945
202094_at	332	BIRC5	baculoviral IAP repeat-containing 5	-1.46814
213802_at	-	-	-	-1.46542
218308_at	10460	TACC3	transforming, acidic coiled-coil containing protein 3	-1.46216
218782_s_at	29028	ATAD2	ATPase family, AAA domain containing 2	-1.45928
202338_at	7083	TK1	thymidine kinase 1, soluble	-1.45809
242890_at	-	-	-	-1.45367
236312_at	-	-	-	-1.44947
212681_at	23136	EPB41L3	erythrocyte membrane protein band 4.1-like 3	-1.44332
225834_at	653573	GCUD2	gastric cancer up-regulated-2	-1.44244
201890_at	6241	RRM2	ribonucleotide reductase M2 polypeptide	-1.44057
214804_at	2491	CENPI	centromere protein I	-1.43968
216237_s_at	4174	MCM5	minichromosome maintenance complex component 5	-1.43962
201755_at	4174	MCM5	minichromosome maintenance complex component 5	-1.4388
208894_at	3122	HLA-DRA	major histocompatibility complex, class II, DR alpha	-1.43356
220658_s_at	56938	ARNTL2	aryl hydrocarbon receptor nuclear translocator-like 2	-1.43354
213167_s_at	6526	SLC5A3	solute carrier family 5 (sodium/myo-inositol cotransporter), member 3	-1.42545
214710_s_at	891	CCNB1	cyclin B1	-1.42264
219778_at	23414	ZFPM2	zinc finger protein, multitype 2	-1.42213
205681_at	597	BCL2A1	BCL2-related protein A1	-1.42179
222118_at	55839	CENPN	centromere protein N	-1.41975
209395_at	1116	CHI3L1	chitinase 3-like 1 (cartilage glycoprotein-39)	-1.41047
212023_s_at	4288	MKI67	antigen identified by monoclonal antibody Ki-67	-1.4021
203665_at	3162	HMOX1	heme oxygenase (decycling) 1	-1.3987
221436_s_at	83461	CDCA3	cell division cycle associated 3	-1.39788
242560_at	2177	FANCD2	Fanconi anemia, complementation group D2	-1.39349
226661_at	157313	CDCA2	cell division cycle associated 2	-1.39
204932_at	4982	TNFRSF11B	tumor necrosis factor receptor superfamily, member 11b	-1.38965
203362_s_at	4085	MAD2L1	MAD2 mitotic arrest deficient-like 1 (yeast)	-1.38916
200783_s_at	3925	STMN1	stathmin 1/oncoprotein 18	-1.38799
244849_at	10371	SEMA3A	sema domain, immunoglobulin domain (Ig), short basic domain, secreted, (semaphorin) 3A	-1.38668
210982_s_at	3122	HLA-DRA	major histocompatibility complex, class II, DR alpha	-1.38441
236957_at	157313	CDCA2	cell division cycle associated 2	-1.3658
221591_s_at	54478	FAM64A	family with sequence similarity 64, member A	-1.36516
202589_at	7298	TYMS	thymidylate synthetase	-1.35606
229610_at	150468	CKAP2L	cytoskeleton associated protein 2-like	-1.35217
209278_s_at	7980	TFPI2	tissue factor pathway inhibitor 2	-1.35086
218662_s_at	64151	NCAPG	non-SMC condensin I complex, subunit G	-1.34741
205828_at	4314	MMP3	matrix metallopeptidase 3 (stromelysin 1, progelatinase)	-1.33858
218294_s_at	10762	NUP50	nucleoporin 50kDa	-1.32251
227506_at	220963	SLC16A9	solute carrier family 16, member 9 (monocarboxylic acid transporter 9)	-1.3218
209921_at	23657	SLC7A11	solute carrier family 7, (cationic amino acid transporter, y+ system) member 11	-1.32027
227928_at	55010	C12orf48	chromosome 12 open reading frame 48	-1.31751
203126_at	3613	IMPA2	inositol(myo)-1(or 4)-monophosphatase 2	-1.31527
206364_at	9928	KIF14	kinesin family member 14	-1.31375
217678_at	23657	SLC7A11	solute carrier family 7, (cationic amino acid transporter, y+ system) member 11	-1.31135
241773_at	-	-	-	-1.30932
208378_x_at	2250	FGF5	fibroblast growth factor 5	-1.2976
206377_at	2295	FOXF2	forkhead box F2	-1.2917
228273_at	-	-	-	-1.29168
205891_at	136	ADORA2B	adenosine A2b receptor	-1.28419
218883_s_at	79682	MLF1IP	MLF1 interacting protein	-1.28362
210538_s_at	330	BIRC3	baculoviral IAP repeat-containing 3	-1.28256
204603_at	9156	EXO1	exonuclease 1	-1.28216
223557_s_at	23671	TMEFF2	transmembrane protein with EGF-like and two follistatin-like domains 2	-1.28032
218875_s_at	26271	FBXO5	F-box protein 5	-1.2793
205063_at	8487	SIP1	survival of motor neuron protein interacting protein 1	-1.27809
213094_at	57211	GPR126	G protein-coupled receptor 126	-1.27548
218585_s_at	51514	DTL	denticleless homolog (Drosophila)	-1.27422
223541_at	3038	HAS3	hyaluronan synthase 3	-1.26793
215813_s_at	5742	PTGS1	prostaglandin-endoperoxide synthase 1 (prostaglandin G/H synthase and cyclooxygenase)	-1.2664
231772_x_at	64946	CENPH	centromere protein H	-1.26318
211080_s_at	4751	NEK2	NIMA (never in mitosis gene a)-related kinase 2	-1.26
1555973_at	-	-	-	-1.25763
227165_at	221150	C13orf3	chromosome 13 open reading frame 3	-1.25677
206757_at	8654	PDE5A	phosphodiesterase 5A, cGMP-specific	-1.25628
205466_s_at	9957	HS3ST1	heparan sulfate (glucosamine) 3-O-sulfotransferase 1	-1.2502
221521_s_at	51659	GINS2	GINS complex subunit 2 (Psf2 homolog)	-1.24446
222962_s_at	55388	MCM10	minichromosome maintenance complex component 10	-1.24328
205235_s_at	9585	KIF20B	kinesin family member 20B	-1.24267
208795_s_at	4176	MCM7	minichromosome maintenance complex component 7	-1.23819
244572_at	339855	KY	kyphoscoliosis peptidase	-1.23494
239253_at	-	-	-	-1.2315
210052_s_at	22974	TPX2	TPX2, microtubule-associated, homolog (Xenopus laevis)	-1.22783
226630_at	55320	C14orf106	chromosome 14 open reading frame 106	-1.22771
211450_s_at	2956	MSH6	mutS homolog 6 (E. coli)	-1.22722
223274_at	6941	TCF19	transcription factor 19 (SC1)	-1.2183
209789_at	10391	CORO2B	coronin, actin binding protein, 2B	-1.21764
219650_at	54821	ERCC6L	excision repair cross-complementing rodent repair deficiency, complementation group 6-like	-1.21257
205515_at	8492	PRSS12	protease, serine, 12 (neurotrypsin, motopsin)	-1.21127
226824_at	119587	CPXM2	carboxypeptidase X (M14 family), member 2	-1.21114
222680_s_at	51514	DTL	denticleless homolog (Drosophila)	-1.20909
213226_at	890	CCNA2	cyclin A2	-1.2033
1553810_a_at	57650	KIAA1524	KIAA1524	-1.20228
220085_at	3070	HELLS	helicase, lymphoid-specific	-1.20149
209464_at	9212	AURKB	aurora kinase B	-1.20114
209172_s_at	1063	CENPF	centromere protein F, 350/400ka (mitosin)	-1.19583
1552487_a_at	646	BNC1	basonuclin 1	-1.19462
235182_at	140862	C20orf82	chromosome 20 open reading frame 82	-1.19365
214581_x_at	27242	TNFRSF21	tumor necrosis factor receptor superfamily, member 21	-1.19231
225612_s_at	84002	B3GNT5	UDP-GlcNAc:betaGal beta-1,3-N-acetylglucosaminyltransferase 5	-1.189
213355_at	10402	ST3GAL6	ST3 beta-galactoside alpha-2,3-sialyltransferase 6	-1.18456
217640_x_at	220134	C18orf24	chromosome 18 open reading frame 24	-1.1813
241404_at	-	-	-	-1.18097
241360_at	80071	CCDC15	coiled-coil domain containing 15	-1.18035
227545_at	-	-	-	-1.18018
205347_s_at	11013	TMSL8	thymosin-like 8	-1.18011
210138_at	8601	RGS20	regulator of G-protein signaling 20	-1.17995
212801_at	11113	CIT	citron (rho-interacting, serine/threonine kinase 21)	-1.17789
228952_at	5167	ENPP1	ectonucleotide pyrophosphatase/phosphodiesterase 1	-1.17725
236824_at	114795	TMEM132B	transmembrane protein 132B	-1.17693
201476_s_at	6240	RRM1	ribonucleotide reductase M1	-1.17411
218741_at	79019	CENPM	centromere protein M	-1.17388
204492_at	9824	ARHGAP11A	Rho GTPase activating protein 11A	-1.16991
209708_at	26002	MOXD1	monooxygenase, DBH-like 1	-1.16902
205066_s_at	5167	ENPP1	ectonucleotide pyrophosphatase/phosphodiesterase 1	-1.16884
204933_s_at	4982	TNFRSF11B	tumor necrosis factor receptor superfamily, member 11b	-1.16631
204146_at	10635	RAD51AP1	RAD51 associated protein 1	-1.1654
204597_x_at	6781	STC1	stanniocalcin 1	-1.15671
226438_at	-	-	-	-1.15505
229551_x_at	195828	ZNF367	zinc finger protein 367	-1.15289
205053_at	5557	PRIM1	primase, DNA, polypeptide 1 (49kDa)	-1.14641
203358_s_at	2146	EZH2	enhancer of zeste homolog 2 (Drosophila)	-1.14603
210057_at	23049	SMG1	PI-3-kinase-related kinase SMG-1	-1.14567
211814_s_at	9134	CCNE2	cyclin E2	-1.14435
222740_at	29028	ATAD2	ATPase family, AAA domain containing 2	-1.14259
221258_s_at	81930	KIF18A	kinesin family member 18A	-1.14172
222039_at	146909	KIF18B	kinesin family member 18B	-1.14118
227396_at	5795	PTPRJ	protein tyrosine phosphatase, receptor type, J	-1.1395
210432_s_at	6328	SCN3A	sodium channel, voltage-gated, type III, alpha subunit	-1.13816
204126_s_at	8318	CDC45L	CDC45 cell division cycle 45-like (S. cerevisiae)	-1.13698
206860_s_at	54468	FLJ20323	hypothetical protein FLJ20323	-1.13566
222582_at	51422	PRKAG2	protein kinase, AMP-activated, gamma 2 non-catalytic subunit	-1.13375
242450_at	285704	RGMB	RGM domain family, member B	-1.12953
203209_at	5985	RFC5	replication factor C (activator 1) 5, 36.5kDa	-1.12534
1554474_a_at	26002	MOXD1	monooxygenase, DBH-like 1	-1.12495
226456_at	116028	C16orf75	chromosome 16 open reading frame 75	-1.12374
220295_x_at	55635	DEPDC1	DEP domain containing 1	-1.12328
227875_at	90293	KLHL13	kelch-like 13 (Drosophila)	-1.12311
203022_at	10535	RNASEH2A	ribonuclease H2, subunit A	-1.12229
202173_s_at	7716	VEZF1	vascular endothelial zinc finger 1	-1.11751
238512_at	-	-	-	-1.11698
206766_at	8515	ITGA10	integrin, alpha 10	-1.11555
234863_x_at	26271	FBXO5	F-box protein 5	-1.11166
209396_s_at	1116	CHI3L1	chitinase 3-like 1 (cartilage glycoprotein-39)	-1.10731
222077_s_at	29127	RACGAP1	Rac GTPase activating protein 1	-1.10668
210692_s_at	29015	SLC43A3	solute carrier family 43, member 3	-1.10471
48808_at	1719	DHFR	dihydrofolate reductase	-1.10422
204092_s_at	6790	AURKA	aurora kinase A	-1.10171
228597_at	54069	C21orf45	chromosome 21 open reading frame 45	-1.10127
202107_s_at	4171	MCM2	minichromosome maintenance complex component 2	-1.09928
221933_at	57502	NLGN4X	neuroligin 4, X-linked	-1.09613
213008_at	55215	FANCI	Fanconi anemia, complementation group I	-1.09591
222037_at	4173	MCM4	minichromosome maintenance complex component 4	-1.09526
204026_s_at	11130	ZWINT	ZW10 interactor	-1.09487
209753_s_at	7112	TMPO	thymopoietin	-1.09331
224856_at	2289	FKBP5	FK506 binding protein 5	-1.0931
204825_at	9833	MELK	maternal embryonic leucine zipper kinase	-1.09144
225655_at	29128	UHRF1	ubiquitin-like with PHD and ring finger domains 1	-1.09006
201663_s_at	10051	SMC4	structural maintenance of chromosomes 4	-1.08989
224200_s_at	56852	RAD18	RAD18 homolog (S. cerevisiae)	-1.08978
232424_at	63976	PRDM16	PR domain containing 16	-1.08918
238469_at	79627	OGFRL1	opioid growth factor receptor-like 1	-1.0878
209277_at	7980	TFPI2	tissue factor pathway inhibitor 2	-1.086
224219_s_at	7223	TRPC4	transient receptor potential cation channel, subfamily C, member 4	-1.0841
217546_at	4499	MT1M	metallothionein 1M	-1.08121
209053_s_at	7468	WHSC1	Wolf-Hirschhorn syndrome candidate 1	-1.07956
228069_at	113115	FAM54A	family with sequence similarity 54, member A	-1.07874
206392_s_at	5918	RARRES1	retinoic acid receptor responder (tazarotene induced) 1	-1.07812
209541_at	3479	IGF1	insulin-like growth factor 1 (somatomedin C)	-1.07772
244033_at	145508	C14orf145	chromosome 14 open reading frame 145	-1.0774
212836_at	10714	POLD3	polymerase (DNA-directed), delta 3, accessory subunit	-1.07411
237252_at	7056	THBD	thrombomodulin	-1.07385
1552658_a_at	89795	NAV3	neuron navigator 3	-1.07204
220238_s_at	55975	KLHL7	kelch-like 7 (Drosophila)	-1.06773
230165_at	151246	SGOL2	shugoshin-like 2 (S. pombe)	-1.06738
240407_at	100126784	LOC100126784	hypothetical LOC100126784	-1.06684
205961_s_at	11168	PSIP1	PC4 and SFRS1 interacting protein 1	-1.06411
242486_at	-	-	-	-1.06386
211519_s_at	11004	KIF2C	kinesin family member 2C	-1.0574
1553313_s_at	6526	SLC5A3	solute carrier family 5 (sodium/myo-inositol cotransporter), member 3	-1.05565
1552921_a_at	63979	FIGNL1	fidgetin-like 1	-1.05478
219555_s_at	55839	CENPN	centromere protein N	-1.05428
219087_at	54829	ASPN	asporin	-1.05264
210543_s_at	5591	PRKDC	protein kinase, DNA-activated, catalytic polypeptide	-1.05128
218149_s_at	55893	ZNF395	zinc finger protein 395	-1.05112
235276_at	94240	EPSTI1	epithelial stromal interaction 1 (breast)	-1.04977
218733_at	55167	MSL2L1	male-specific lethal 2-like 1 (Drosophila)	-1.04784
208998_at	7351	UCP2	uncoupling protein 2 (mitochondrial, proton carrier)	-1.04135
211776_s_at	23136	EPB41L3	erythrocyte membrane protein band 4.1-like 3	-1.03973
208394_x_at	11082	ESM1	endothelial cell-specific molecule 1	-1.03934
203508_at	7133	TNFRSF1B	tumor necrosis factor receptor superfamily, member 1B	-1.03919
233655_s_at	54801	FAM29A	family with sequence similarity 29, member A	-1.03641
204441_s_at	23649	POLA2	polymerase (DNA directed), alpha 2 (70kD subunit)	-1.03614
210311_at	2250	FGF5	fibroblast growth factor 5	-1.03163
202534_x_at	1719	DHFR	dihydrofolate reductase	-1.03022
204472_at	2669	GEM	GTP binding protein overexpressed in skeletal muscle	-1.03021
219978_s_at	51203	NUSAP1	nucleolar and spindle associated protein 1	-1.02816
242787_at	-	-	-	-1.02242
203046_s_at	8914	TIMELESS	timeless homolog (Drosophila)	-1.02157
223556_at	3070	HELLS	helicase, lymphoid-specific	-1.02156
201850_at	822	CAPG	capping protein (actin filament), gelsolin-like	-1.02088
244669_at	26799	SNORD50A	small nucleolar RNA, C/D box 50A	-1.02018
203554_x_at	9232	PTTG1	pituitary tumor-transforming 1	-1.01873
205296_at	5933	RBL1	retinoblastoma-like 1 (p107)	-1.01846
211505_s_at	6780	STAU1	staufen, RNA binding protein, homolog 1 (Drosophila)	-1.0181
202888_s_at	290	ANPEP	alanyl (membrane) aminopeptidase	-1.01788
220738_s_at	27330	RPS6KA6	ribosomal protein S6 kinase, 90kDa, polypeptide 6	-1.01177
219295_s_at	26577	PCOLCE2	procollagen C-endopeptidase enhancer 2	-1.00782
213416_at	3676	ITGA4	integrin, alpha 4 (antigen CD49D, alpha 4 subunit of VLA-4 receptor)	-1.00131
203700_s_at	1734	DIO2	deiodinase, iodothyronine, type II	-1.00071
235609_at	-	-	-	-1.00053
List of genes induced by SYT-SSX1 expression in human MSCs batch 3
probeset	entrez	gene_symbol	description	M
213418_at	3310	HSPA6	heat shock 70kDa protein 6 (HSP70B')	5.41294
213479_at	4885	NPTX2	neuronal pentraxin II	4.61332
117_at	3310	HSPA6	heat shock 70kDa protein 6 (HSP70B')	4.60923
230748_at	9120	SLC16A6	solute carrier family 16, member 6 (monocarboxylic acid transporter 7)	3.92341
205239_at	374	AREG	amphiregulin	3.65928
242005_at	-	-	-	3.50975
225207_at	5166	PDK4	pyruvate dehydrogenase kinase, isozyme 4	3.43426
204684_at	4884	NPTX1	neuronal pentraxin I	3.16947
206924_at	3589	IL11	interleukin 11	3.11448
207038_at	9120	SLC16A6	solute carrier family 16, member 6 (monocarboxylic acid transporter 7)	3.00302
217388_s_at	8942	KYNU	kynureninase (L-kynurenine hydrolase)	2.87469
209875_s_at	6696	SPP1	secreted phosphoprotein 1	2.70236
202581_at	3303	HSPA1A	heat shock 70kDa protein 1A	2.66233
209652_s_at	5228	PGF	placental growth factor	2.63375
205767_at	2069	EREG	epiregulin	2.61476
243483_at	79054	TRPM8	transient receptor potential cation channel, subfamily M, member 8	2.48657
1568768_s_at	9577	BRE	brain and reproductive organ-expressed (TNFRSF1A modulator)	2.47744
241418_at	344887	LOC344887	similar to hCG2041270	2.45023
211597_s_at	84525	HOPX	HOP homeobox	2.44563
200800_s_at	3303	HSPA1A	heat shock 70kDa protein 1A	2.44033
210387_at	8339	HIST1H2BG	histone cluster 1, H2bg	2.3553
1557051_s_at	-	-	-	2.32826
242931_at	79836	LONRF3	LON peptidase N-terminal domain and ring finger 3	2.31518
206209_s_at	762	CA4	carbonic anhydrase IV	2.28484
204621_s_at	4929	NR4A2	nuclear receptor subfamily 4, group A, member 2	2.24163
213506_at	2150	F2RL1	coagulation factor II (thrombin) receptor-like 1	2.23843
229580_at	-	-	-	2.23115
207316_at	3036	HAS1	hyaluronan synthase 1	2.20719
224480_s_at	84803	AGPAT9	1-acylglycerol-3-phosphate O-acyltransferase 9	2.1772
230493_at	387914	SHISA2	shisa homolog 2 (Xenopus laevis)	2.16324
205289_at	650	BMP2	bone morphogenetic protein 2	2.09879
202672_s_at	467	ATF3	activating transcription factor 3	2.07726
232035_at	8294	HIST1H4I	histone cluster 1, H4i	2.0061
207528_s_at	23657	SLC7A11	solute carrier family 7, (cationic amino acid transporter, y+ system) member 11	1.99853
208180_s_at	8294	HIST1H4I	histone cluster 1, H4i	1.99761
211343_s_at	1305	COL13A1	collagen, type XIII, alpha 1	1.99565
1559141_s_at	157693	FAM87A	family with sequence similarity 87, member A	1.9876
216248_s_at	4929	NR4A2	nuclear receptor subfamily 4, group A, member 2	1.98218
210654_at	8793	TNFRSF10D	tumor necrosis factor receptor superfamily, member 10d, decoy with truncated death domain	1.97279
230123_at	55707	NECAP2	NECAP endocytosis associated 2	1.96603
236824_at	114795	TMEM132B	transmembrane protein 132B	1.94786
206561_s_at	57016	AKR1B10	aldo-keto reductase family 1, member B10 (aldose reductase)	1.94471
208744_x_at	10808	HSPH1	heat shock 105kDa/110kDa protein 1	1.93378
210143_at	11199	ANXA10	annexin A10	1.92426
205290_s_at	650	BMP2	bone morphogenetic protein 2	1.92072
214414_x_at	3039	HBA1	hemoglobin, alpha 1	1.90305
205935_at	2294	FOXF1	forkhead box F1	1.88835
228033_at	144455	E2F7	E2F transcription factor 7	1.86441
210663_s_at	8942	KYNU	kynureninase (L-kynurenine hydrolase)	1.86104
208937_s_at	3397	ID1	inhibitor of DNA binding 1, dominant negative helix-loop-helix protein	1.86016
204977_at	1662	DDX10	DEAD (Asp-Glu-Ala-Asp) box polypeptide 10	1.85363
215193_x_at	3119	HLA-DQB1	major histocompatibility complex, class II, DQ beta 1	1.84708
214841_at	149111	CNIH3	cornichon homolog 3 (Drosophila)	1.83957
238568_s_at	-	-	-	1.83556
217678_at	23657	SLC7A11	solute carrier family 7, (cationic amino acid transporter, y+ system) member 11	1.81798
203395_s_at	3280	HES1	hairy and enhancer of split 1, (Drosophila)	1.81623
230104_s_at	11076	TPPP	tubulin polymerization promoting protein	1.78603
228570_at	121551	BTBD11	BTB (POZ) domain containing 11	1.78578
219257_s_at	8877	SPHK1	sphingosine kinase 1	1.77835
224454_at	55500	ETNK1	ethanolamine kinase 1	1.77771
205067_at	3553	IL1B	interleukin 1, beta	1.77371
223710_at	10344	CCL26	chemokine (C-C motif) ligand 26	1.77192
221019_s_at	81035	COLEC12	collectin sub-family member 12	1.77152
200666_s_at	3337	DNAJB1	DnaJ (Hsp40) homolog, subfamily B, member 1	1.75782
219682_s_at	6926	TBX3	T-box 3	1.75455
39402_at	3553	IL1B	interleukin 1, beta	1.74532
219714_s_at	55799	CACNA2D3	calcium channel, voltage-dependent, alpha 2/delta subunit 3	1.74395
237252_at	7056	THBD	thrombomodulin	1.72099
214469_at	3012	HIST1H2AE	histone cluster 1, H2ae	1.71459
203888_at	7056	THBD	thrombomodulin	1.70822
214016_s_at	6421	SFPQ	splicing factor proline/glutamine-rich (polypyrimidine tract binding protein associated)	1.70534
214455_at	8339	HIST1H2BG	histone cluster 1, H2bg	1.69859
201348_at	2878	GPX3	glutathione peroxidase 3 (plasma)	1.68653
213246_at	26175	C14orf109	chromosome 14 open reading frame 109	1.68442
1556200_a_at	118611	C10orf90	chromosome 10 open reading frame 90	1.68408
235456_at	-	-	-	1.67951
1568879_a_at	3909	LAMA3	laminin, alpha 3	1.67945
220334_at	26575	RGS17	regulator of G-protein signaling 17	1.67032
230644_at	145581	LRFN5	leucine rich repeat and fibronectin type III domain containing 5	1.67019
220346_at	441024	MTHFD2L	methylenetetrahydrofolate dehydrogenase (NADP+ dependent) 2-like	1.66606
219412_at	23682	RAB38	RAB38, member RAS oncogene family	1.65892
214091_s_at	2878	GPX3	glutathione peroxidase 3 (plasma)	1.65866
223557_s_at	23671	TMEFF2	transmembrane protein with EGF-like and two follistatin-like domains 2	1.65846
205543_at	22824	HSPA4L	heat shock 70kDa protein 4-like	1.6543
203821_at	1839	HBEGF	heparin-binding EGF-like growth factor	1.65157
209312_x_at	3119	HLA-DQB1	major histocompatibility complex, class II, DQ beta 1	1.64855
1559060_a_at	96459	FNIP1	folliculin interacting protein 1	1.64798
1559140_at	157693	FAM87A	family with sequence similarity 87, member A	1.64346
203887_s_at	7056	THBD	thrombomodulin	1.64326
204748_at	5743	PTGS2	prostaglandin-endoperoxide synthase 2 (prostaglandin G/H synthase and cyclooxygenase)	1.6411
204385_at	8942	KYNU	kynureninase (L-kynurenine hydrolase)	1.63113
204622_x_at	4929	NR4A2	nuclear receptor subfamily 4, group A, member 2	1.63034
204724_s_at	1299	COL9A3	collagen, type IX, alpha 3	1.62962
201920_at	6574	SLC20A1	solute carrier family 20 (phosphate transporter), member 1	1.60774
1562102_at	1645	AKR1C1	aldo-keto reductase family 1, member C1 (dihydrodiol dehydrogenase 1; 20-alpha (3-alpha)-hydroxysteroid dehydrogenase)	1.60544
209047_at	358	AQP1	aquaporin 1 (Colton blood group)	1.60502
234685_x_at	85286	KRTAP4-9	keratin associated protein 4-9	1.59814
210145_at	5321	PLA2G4A	phospholipase A2, group IVA (cytosolic, calcium-dependent)	1.58703
244025_at	-	-	-	1.57093
211506_s_at	3576	IL8	interleukin 8	1.56947
227044_at	-	-	-	1.56908
221986_s_at	54800	KLHL24	kelch-like 24 (Drosophila)	1.56882
209277_at	7980	TFPI2	tissue factor pathway inhibitor 2	1.56455
222780_s_at	79870	BAALC	brain and acute leukemia, cytoplasmic	1.55829
229070_at	84830	C6orf105	chromosome 6 open reading frame 105	1.55709
228388_at	4793	NFKBIB	nuclear factor of kappa light polypeptide gene enhancer in B-cells inhibitor, beta	1.55292
242775_at	-	-	-	1.55206
219155_at	26207	PITPNC1	phosphatidylinositol transfer protein, cytoplasmic 1	1.55115
200664_s_at	3337	DNAJB1	DnaJ (Hsp40) homolog, subfamily B, member 1	1.55082
238545_at	29117	BRD7	bromodomain containing 7	1.5438
242064_at	54549	SDK2	sidekick homolog 2 (chicken)	1.53991
211968_s_at	3320	HSP90AA1	heat shock protein 90kDa alpha (cytosolic), class A member 1	1.53754
223251_s_at	55608	ANKRD10	ankyrin repeat domain 10	1.53734
224453_s_at	55500	ETNK1	ethanolamine kinase 1	1.53447
214472_at	8351	HIST1H3D	histone cluster 1, H3d	1.52697
226913_s_at	30812	SOX8	SRY (sex determining region Y)-box 8	1.52527
227297_at	3680	ITGA9	integrin, alpha 9	1.52482
223644_s_at	1427	CRYGS	crystallin, gamma S	1.52251
228825_at	22949	PTGR1	prostaglandin reductase 1	1.51669
209278_s_at	7980	TFPI2	tissue factor pathway inhibitor 2	1.51273
236468_at	-	-	-	1.50746
205681_at	597	BCL2A1	BCL2-related protein A1	1.50575
243918_at	-	-	-	1.50169
218681_s_at	23753	SDF2L1	stromal cell-derived factor 2-like 1	1.50124
235014_at	147727	LOC147727	hypothetical LOC147727	1.49839
203217_s_at	8869	ST3GAL5	ST3 beta-galactoside alpha-2,3-sialyltransferase 5	1.49173
200894_s_at	2288	FKBP4	FK506 binding protein 4, 59kDa	1.48601
222736_s_at	55151	TMEM38B	transmembrane protein 38B	1.48503
239360_at	-	-	-	1.48288
230511_at	1390	CREM	cAMP responsive element modulator	1.48136
231518_at	283867	LOC283867	hypothetical protein LOC283867	1.48022
225582_at	85450	ITPRIP	inositol 1,4,5-triphosphate receptor interacting protein	1.47793
224925_at	57580	PREX1	phosphatidylinositol-3,4,5-trisphosphate-dependent Rac exchange factor 1	1.47628
204465_s_at	9118	INA	internexin neuronal intermediate filament protein, alpha	1.47447
235250_at	201163	FLCN	folliculin	1.47328
238649_at	26207	PITPNC1	phosphatidylinositol transfer protein, cytoplasmic 1	1.47262
226800_at	84455	EFCAB7	EF-hand calcium binding domain 7	1.47057
209732_at	9976	CLEC2B	C-type lectin domain family 2, member B	1.46882
206110_at	8357	HIST1H3H	histone cluster 1, H3h	1.46202
205765_at	1577	CYP3A5	cytochrome P450, family 3, subfamily A, polypeptide 5	1.46001
204475_at	4312	MMP1	matrix metallopeptidase 1 (interstitial collagenase)	1.45848
220265_at	57720	GPR107	G protein-coupled receptor 107	1.45314
[truncated: 1,343 more rows]
