# Supplementary material for: Epigenetic Features of Human Mesenchymal Stem Cells Determine Their Permissiveness for Induction of Relevant Transcriptional Changes by SYT-SSX1
Source: PLoS One. 2009 Nov 19;4(11):e7904. doi: 10.1371/journal.pone.0007904 (PMC2775947; doi:10.1371/journal.pone.0007904)
Supplement: Table S4 — Overlap of the lists of differentially expressed genes in the single-batch lists (MSCs b1–b4) and the lists derived from the rank-product analysis (MSCs rankproduct) with the databases of imprinted genes (Geneimprint and Otago). (0.07 MB XLS) [file pone.0007904.s007.xls]

## Sheet: S4
Table S4. Overlap of the lists of differentially expressed genes in the single-batch (MSCs b1-b4) and in the lists derived from the rank-product analysis (MSCs rankproduct) with the databases of imprinted genes Geneimprint and Otago.
	geneimprint (experimentally confirmed)	geneimprint (all)	Otago
MSCs batch 3 repressed	n=1 (0.7)	n=1 (2.3)	n=1 (0.7)
	P=0.49	P=0.33	P=0.52
MSCs batch 3 induced	n=1 (0.9)	n=8 (3.2)	n=1 (1.0)
	P=0.6	P=0.014	P=0.73
MSCs batch 4 repressed	n=0 (0.2)	n=0 (0.8)	n=0 (0.3)
	P=0.79	P=0.45	P=0.77
MSCs batch 4 induced	n=4 (0.6)	n=8 (1.9)	n=4 (0.6)
	P=0.0024	P=0.00077	P=0.0035
MSCs batch 1 repressed	n=2 (1.2)	n=4 (4.1)	n=2 (1.3)
	P=0.34	P=0.6	P=0.39
MSCs batch 1 induced	n=4 (1.0)	n=11 (3.3)	n=3 (1.1)
	P=0.015	P=0.00051	P=0.091
MSCs batch 2 repressed	n=1 (0.5)	n=4 (1.9)	n=1 (0.6)
	P=0.42	P=0.12	P=0.46
MSCs batch 2 induced	n=5 (0.4)	n=11 (1.4)	n=5 (0.5)
	P=5.1e-05	P=1.7e-07	P=8.6e-05
MSCs (rankproduct) repressed	n=0 (0.1)	n=0 (0.2)	n=0 (0.1)
	P=0.93	P=0.79	P=0.93
MSCs (rankproduct) induced	n=5 (0.2)	n=10 (0.7)	n=5 (0.2)
	P=1.6e-06	P=1.6e-09	P=2.7e-06
Statistical analysis: n = number of found genes. In parenthesis number of expected by chance . P-values are indicated, significant P-values (P<0.05) are in bold. Links provide the corresponding lists of genes reported below.
common MSCs b3.repressed and geneimprint (1 elements, expected 0.7, P=0.49, adjP=1)
4232	MEST	mesoderm specific transcript homolog (mouse)
common MSCs b3.repressed and geneimprint_all (1 elements, expected 2.3, P=0.33, adjP=1)
4232	MEST	mesoderm specific transcript homolog (mouse)
common MSCs b3.repressed and otago (1 elements, expected 0.7, P=0.52, adjP=1)
4232	MEST	mesoderm specific transcript homolog (mouse)
common MSCs b3.induced and geneimprint (1 elements, expected 0.9, P=0.6, adjP=1)
7980	TFPI2	tissue factor pathway inhibitor 2
common MSCs b3.induced and geneimprint_all (8 elements, expected 3.2, P=0.014, adjP=0.86)
1299	COL9A3	collagen, type IX, alpha 3
144455	E2F7	E2F transcription factor 7
2294	FOXF1	forkhead box F1
3280	HES1	hairy and enhancer of split 1, (Drosophila)
3310	HSPA6	heat shock 70kDa protein 6 (HSP70B')
30812	SOX8	SRY (sex determining region Y)-box 8
7980	TFPI2	tissue factor pathway inhibitor 2
49856	WDR8	WD repeat domain 8
common MSCs b3.induced and otago (1 elements, expected 1.0, P=0.73, adjP=1)
7980	TFPI2	tissue factor pathway inhibitor 2
common MSCs b4.induced and geneimprint (4 elements, expected 0.6, P=0.0024, adjP=0.14)
1028	CDKN1C	cyclin-dependent kinase inhibitor 1C (p57, Kip2)
8788	DLK1	delta-like 1 homolog (Drosophila)
283120	H19	H19, imprinted maternally expressed transcript (non-protein coding)
3481	IGF2	insulin-like growth factor 2 (somatomedin A)
common MSCs b4.induced and geneimprint_all (8 elements, expected 1.9, P=0.00077, adjP=0.046)
1028	CDKN1C	cyclin-dependent kinase inhibitor 1C (p57, Kip2)
1299	COL9A3	collagen, type IX, alpha 3
8788	DLK1	delta-like 1 homolog (Drosophila)
283120	H19	H19, imprinted maternally expressed transcript (non-protein coding)
3280	HES1	hairy and enhancer of split 1, (Drosophila)
3481	IGF2	insulin-like growth factor 2 (somatomedin A)
30812	SOX8	SRY (sex determining region Y)-box 8
10417	SPON2	spondin 2, extracellular matrix protein
common MSCs b4.induced and otago (4 elements, expected 0.6, P=0.0035, adjP=0.21)
1028	CDKN1C	cyclin-dependent kinase inhibitor 1C (p57, Kip2)
8788	DLK1	delta-like 1 homolog (Drosophila)
283120	H19	H19, imprinted maternally expressed transcript (non-protein coding)
3481	IGF2	insulin-like growth factor 2 (somatomedin A)
common MSCs b1.repressed and geneimprint (2 elements, expected 1.2, P=0.34, adjP=1)
55384	MEG3	maternally expressed 3 (non-protein coding)
4232	MEST	mesoderm specific transcript homolog (mouse)
common MSCs b1.repressed and geneimprint_all (4 elements, expected 4.1, P=0.6, adjP=1)
55384	MEG3	maternally expressed 3 (non-protein coding)
4232	MEST	mesoderm specific transcript homolog (mouse)
29085	PHPT1	phosphohistidine phosphatase 1
678	ZFP36L2	zinc finger protein 36, C3H type-like 2
common MSCs b1.repressed and otago (2 elements, expected 1.3, P=0.39, adjP=1)
55384	MEG3	maternally expressed 3 (non-protein coding)
4232	MEST	mesoderm specific transcript homolog (mouse)
common MSCs b1.induced and geneimprint (4 elements, expected 1.0, P=0.015, adjP=0.91)
9077	DIRAS3	DIRAS family, GTP-binding RAS-like 3
3481	IGF2	insulin-like growth factor 2 (somatomedin A)
5178	PEG3	paternally expressed 3
6638	SNRPN	small nuclear ribonucleoprotein polypeptide N
common MSCs b1.induced and geneimprint_all (11 elements, expected 3.3, P=0.00051, adjP=0.031)
1299	COL9A3	collagen, type IX, alpha 3
9077	DIRAS3	DIRAS family, GTP-binding RAS-like 3
3280	HES1	hairy and enhancer of split 1, (Drosophila)
3200	HOXA3	homeobox A3
3213	HOXB3	homeobox B3
3310	HSPA6	heat shock 70kDa protein 6 (HSP70B')
3481	IGF2	insulin-like growth factor 2 (somatomedin A)
5178	PEG3	paternally expressed 3
6638	SNRPN	small nuclear ribonucleoprotein polypeptide N
30812	SOX8	SRY (sex determining region Y)-box 8
148203	ZNF738	zinc finger protein 738
common MSCs b1.induced and otago (3 elements, expected 1.1, P=0.091, adjP=1)
9077	DIRAS3	DIRAS family, GTP-binding RAS-like 3
3481	IGF2	insulin-like growth factor 2 (somatomedin A)
5178	PEG3	paternally expressed 3
common MSCs b2.repressed and geneimprint (1 elements, expected 0.5, P=0.42, adjP=1)
7980	TFPI2	tissue factor pathway inhibitor 2
common MSCs b2.repressed and geneimprint_all (4 elements, expected 1.9, P=0.12, adjP=1)
140862	C20orf82	chromosome 20 open reading frame 82
8519	IFITM1	interferon induced transmembrane protein 1 (9-27)
63976	PRDM16	PR domain containing 16
7980	TFPI2	tissue factor pathway inhibitor 2
common MSCs b2.repressed and otago (1 elements, expected 0.6, P=0.46, adjP=1)
7980	TFPI2	tissue factor pathway inhibitor 2
common MSCs b2.induced and geneimprint (5 elements, expected 0.4, P=5.1e-05, adjP=0.0031)
1028	CDKN1C	cyclin-dependent kinase inhibitor 1C (p57, Kip2)
8788	DLK1	delta-like 1 homolog (Drosophila)
283120	H19	H19, imprinted maternally expressed transcript (non-protein coding)
3481	IGF2	insulin-like growth factor 2 (somatomedin A)
5178	PEG3	paternally expressed 3
common MSCs b2.induced and geneimprint_all (11 elements, expected 1.4, P=1.7e-07, adjP=1e-05)
1028	CDKN1C	cyclin-dependent kinase inhibitor 1C (p57, Kip2)
1299	COL9A3	collagen, type IX, alpha 3
8788	DLK1	delta-like 1 homolog (Drosophila)
283120	H19	H19, imprinted maternally expressed transcript (non-protein coding)
3280	HES1	hairy and enhancer of split 1, (Drosophila)
3212	HOXB2	homeobox B2
3213	HOXB3	homeobox B3
3481	IGF2	insulin-like growth factor 2 (somatomedin A)
5178	PEG3	paternally expressed 3
30812	SOX8	SRY (sex determining region Y)-box 8
10417	SPON2	spondin 2, extracellular matrix protein
common MSCs b2.induced and otago (5 elements, expected 0.5, P=8.6e-05, adjP=0.0052)
1028	CDKN1C	cyclin-dependent kinase inhibitor 1C (p57, Kip2)
8788	DLK1	delta-like 1 homolog (Drosophila)
283120	H19	H19, imprinted maternally expressed transcript (non-protein coding)
3481	IGF2	insulin-like growth factor 2 (somatomedin A)
5178	PEG3	paternally expressed 3
common MSCs (rankproduct) .induced and geneimprint (5 elements, expected 0.2, P=1.6e-06, adjP=9.4e-05)
1028	CDKN1C	cyclin-dependent kinase inhibitor 1C (p57, Kip2)
9077	DIRAS3	DIRAS family, GTP-binding RAS-like 3
8788	DLK1	delta-like 1 homolog (Drosophila)
283120	H19	H19, imprinted maternally expressed transcript (non-protein coding)
3481	IGF2	insulin-like growth factor 2 (somatomedin A)
common MSCs (rankproduct) .induced and geneimprint_all (10 elements, expected 0.7, P=1.6e-09, adjP=9.9e-08)
1028	CDKN1C	cyclin-dependent kinase inhibitor 1C (p57, Kip2)
1299	COL9A3	collagen, type IX, alpha 3
9077	DIRAS3	DIRAS family, GTP-binding RAS-like 3
8788	DLK1	delta-like 1 homolog (Drosophila)
283120	H19	H19, imprinted maternally expressed transcript (non-protein coding)
3280	HES1	hairy and enhancer of split 1, (Drosophila)
3310	HSPA6	heat shock 70kDa protein 6 (HSP70B')
3481	IGF2	insulin-like growth factor 2 (somatomedin A)
30812	SOX8	SRY (sex determining region Y)-box 8
10417	SPON2	spondin 2, extracellular matrix protein
common MSCs (rankproduct) .induced and otago (5 elements, expected 0.2, P=2.7e-06, adjP=0.00016)
1028	CDKN1C	cyclin-dependent kinase inhibitor 1C (p57, Kip2)
9077	DIRAS3	DIRAS family, GTP-binding RAS-like 3
8788	DLK1	delta-like 1 homolog (Drosophila)
283120	H19	H19, imprinted maternally expressed transcript (non-protein coding)
3481	IGF2	insulin-like growth factor 2 (somatomedin A)
